# Supplementary material for: Comparative transcriptome provides strategy for phylogenetic analysis and SSR marker development in Chaenomeles
Source: Research Square preprint supplement (doi:10.21203/rs.3.rs-393262/v1), 2021-04-12
Supplement: Supplementary file 2 [file 5f7dc912196a39478d0a0736.xlsx]

## Sheet: Supplementary Table S11
	Preliminary screening primer for 10 Chaenomeles
Othology ID	Gene ID	Tandem repeats	Flagment length(bp)	Forward primer (5’->3’)	Reverse primer(5’->3’)
ORTHOMCL4782	Unigene0000255	(TC)9	251	CCATCAAAGCCTCTGCAAGT	TCCAATACGATGAGTTGGCA
ORTHOMCL4866	Unigene0000411	(GAA)5	243	GCCTGAAGACGAAGTGAAGG	AACTTCGACAGGGTTGTTGG
ORTHOMCL5090	Unigene0000494	(GAA)5	248	AATGGCATAGGCACTGGTTC	ATTGAAGCAGGGTCCACTTG
ORTHOMCL4541	Unigene0000502	(AG)11	104	TCTTCCCTTTCATTTTCCGA	TCTGACCCTTCTCTGGGCTA
ORTHOMCL4735	Unigene0000715	(TCC)5	277	AAGGGGGACGAGTTCTGTTT	GTCTCACCACTCGGTTCGTT
ORTHOMCL4918	Unigene0002821	(CT)6	157	CGCCCACACTTTCTCTGTCT	AGCGGAGGGTGGAAGATAGT
ORTHOMCL9476	Unigene0005963	(TGA)5	162	AAGATGACGGCAATGAGGAC	CATCTTCGCTTCCACTGTCA
ORTHOMCL9232	Unigene0006106	(AGG)6	100	GGGTAGGGGGTGGATTAAGA	GCTCGAGTCAGTTCCCTCAC
ORTHOMCL6247	Unigene0006758	(ACC)8	272	CTGAACAAACTCACCCCCAT	ATTGAACGCTTGGATAACCG
ORTHOMCL5381	Unigene0006832	(AG)6	216	GGAGTTGGGCTTCATTTCAA	GGGTCTGAACGCAGTTTTTC
ORTHOMCL9304	Unigene0007044	(CT)6	248	TGAAAAGCCACCACAAGAGA	CCATGTTTTGGTTTGCTCCT
ORTHOMCL5792	Unigene0007217	(GAA)5	248	TTGATGAAGCGATCGAACAG	TTTGACAAAGACCCTGTCCC
ORTHOMCL9825	Unigene0007287	(CCCTAA)4	202	GGGAAGCCTCTTGTTCTTCC	GTTTGGTTGGTGTCGGAGTT
ORTHOMCL7470	Unigene0007475	(AGA)6	158	TACGGAGGAGGAAGAGCTGA	CTGTGATGGATGAGGGGACT
ORTHOMCL8257	Unigene0013744	(GCA)5	123	CAGATCGGTGAAGGTGGTTT	CCCATCACTTTGTGCCTCTT
ORTHOMCL9834	Unigene0015443	(GGAGAG)4	256	ATTTTGAATCGGACGACGAC	CCATCCTCCATCAAATGCTT
ORTHOMCL8700	Unigene0017696	(AGC)5	184	GAGGACGAAGAAATTGGCAG	ATTTGCAGGTGTAGGGATGC
ORTHOMCL10415	Unigene0017853	(CCG)5	185	GACGAAAATTCTGAGGCCAG	TCTGGGTAGAGGTAGGCGAA
ORTHOMCL8947	Unigene0018745	(CAGCAA)4	211	GCTGCATTACCCAGAAGAGC	GGTTGAGATTAAGGTCGGCA
ORTHOMCL5427	Unigene0019619	(CAA)5	259	GTTCGAAGCAAAGTCAAGCC	GCCCCAAACACAATCTCATT
ORTHOMCL6535	Unigene0019867	(CT)9cactctctcc(CT)6	116	TCACTTTGGTCCATGTCTGC	CGATATGTGTGTGCTCGGAC
ORTHOMCL5540	Unigene0020173	(CAATGC)4	278	GGACTATGTTCCCTTGGGGT	GCCTGAAACTTGAGACTGGC
ORTHOMCL9830	Unigene0020995	(TTC)5	146	GCGTCTCAAATTAAAGGCCA	AACGGTTCTCATTGAGTGGG
ORTHOMCL6690	Unigene0021970	(TAA)5	111	GGATGGAGGAACTCCGTCTT	TTGATTTGATCGATGTGGGA
ORTHOMCL5896	Unigene0022978	(GAA)5	101	TCTAAGCCCTGGTCGAAAGA	CCCGTCTCTCCTCACTTCCT
ORTHOMCL4642	Unigene0023719	(GAA)5	250	ATCAAGGCGTGATGGAAAAG	TTTTGTTTGCTGTGACTCCG
ORTHOMCL5374	Unigene0024742	(ATG)5	158	ATGAAGGCCATCACCATAGG	AGCTGCATTCTTCCTCTCCA
ORTHOMCL5275	Unigene0026344	(AG)6	243	GAATACATGCAAGGGGTGCT	TCTGGCTCGATCTCCAAAAT
ORTHOMCL9439	Unigene0033310	(CTA)6	241	CAATTGTTTGGGTTTGGGTC	TAACACCATCGCAGTCGAAG
ORTHOMCL9944	Unigene0033872	(ACC)5	231	TGTCAGATTGTGCCTGCTTC	TGGGTTGGTGGAGGAGATAG
ORTHOMCL10694	Unigene0034282	(CAC)5	231	GCTCCTTTTGACTGCCTACG	GGGTATTGACCAGGCGAGTA
ORTHOMCL10468	Unigene0035519	(TTC)5	132	AAACACCCAGCATTTTGCTC	TTGGCTTCCCATTATTCTGC
ORTHOMCL10570	Unigene0038343	(TGC)5	273	TGAGGCTCCAAAAGGCTAAA	GAGTTTGGAGACGCTGGAAG
ORTHOMCL8425	Unigene0038421	(CTC)7	137	CCTCACTCACCAACTCGTCA	AGGTTTGGATGGGATTAGGG
ORTHOMCL7693	Unigene0039387	(GGA)5	125	GTGGAGGATGCTCAACCCTA	AAACCGATGGAGCTCGTTTA
ORTHOMCL5495	Unigene0040416	(GCC)7	273	TCTCTCCTGCCGTAACATCC	TCACCGGAGGGTCTATGAAG
ORTHOMCL9771	Unigene0040862	(GAA)6	144	CCACTACCCCAATTGCTCAT	TCCTCAGAGATCAAACCGCT
ORTHOMCL8473	Unigene0040897	(CAC)8	123	GGACCATGGGCAATAACAAC	GAGAGCCATATGATCCGGG
ORTHOMCL7263	Unigene0041273	(GGC)5	171	CCGTACACAAAACAAGCCCT	ATATTCCCGGAAACTGACCC
ORTHOMCL7590	Unigene0041421	(AGA)5	102	TCCGAGACGAAAGAGAGAGC	AAACCTTCATTCCTCCGCTT
ORTHOMCL7030	Unigene0041656	(AGC)10	235	TCAACGAAACTCCATGTCCA	CGGGAGGATCAAATATCGAA
ORTHOMCL5786	Unigene0043030	(GAT)5	135	CTCAGCCAAGCCTTAGCAAC	AGAAGCAGCTGGAATTGGAA
ORTHOMCL10594	Unigene0044652	(CCT)5	256	CATCTTCCACCATTAAACCCC	CCTGCCCTCACCAGAAAATA
ORTHOMCL6606	Unigene0045071	(TGA)8	272	TTGATGAGGGAAGATGGAGG	ACACTCCCACTCGAACCAAC
ORTHOMCL8605	Unigene0047661	(CT)10t(TC)6	192	CACCGTCAAAGCTTCCTCTC	GTGATTTTCTTGACGCCGAT
