# Supplementary material for: Comparative transcriptome provides strategy for phylogenetic analysis and SSR marker development in Chaenomeles
Source: Research Square preprint supplement (doi:10.21203/rs.3.rs-393262/v1), 2021-04-12
Supplement: Supplementary file 6 [file c3a21a88bea74c924246863f.xlsx]

## Sheet: Supplementary Table S2
Common genes of 11 germplasms
ORTHOMCL ID
ORTHOMCL5061
ORTHOMCL5714
ORTHOMCL9373
ORTHOMCL7410
ORTHOMCL7017
ORTHOMCL1231
ORTHOMCL7110
ORTHOMCL3700
ORTHOMCL8186
ORTHOMCL5774
ORTHOMCL7481
ORTHOMCL7155
ORTHOMCL9301
ORTHOMCL2899
ORTHOMCL2050
ORTHOMCL2491
ORTHOMCL9753
ORTHOMCL2443
ORTHOMCL9742
ORTHOMCL10782
ORTHOMCL3961
ORTHOMCL8287
ORTHOMCL4871
ORTHOMCL4350
ORTHOMCL673
ORTHOMCL8214
ORTHOMCL773
ORTHOMCL5045
ORTHOMCL7828
ORTHOMCL1399
ORTHOMCL4813
ORTHOMCL3358
ORTHOMCL7910
ORTHOMCL6479
ORTHOMCL1203
ORTHOMCL5439
ORTHOMCL139
ORTHOMCL3895
ORTHOMCL7494
ORTHOMCL5676
ORTHOMCL1529
ORTHOMCL8632
ORTHOMCL7069
ORTHOMCL6949
ORTHOMCL1832
ORTHOMCL1411
ORTHOMCL4576
ORTHOMCL8528
ORTHOMCL3668
ORTHOMCL5415
ORTHOMCL4949
ORTHOMCL10736
ORTHOMCL5261
ORTHOMCL1068
ORTHOMCL10575
ORTHOMCL10331
ORTHOMCL2756
ORTHOMCL1671
ORTHOMCL2309
ORTHOMCL5745
ORTHOMCL10957
ORTHOMCL1103
ORTHOMCL6778
ORTHOMCL7737
ORTHOMCL8499
ORTHOMCL10522
ORTHOMCL8262
ORTHOMCL8974
ORTHOMCL447
ORTHOMCL9137
ORTHOMCL131
ORTHOMCL10430
ORTHOMCL7761
ORTHOMCL2197
ORTHOMCL8728
ORTHOMCL4273
ORTHOMCL8423
ORTHOMCL878
ORTHOMCL2115
ORTHOMCL609
ORTHOMCL3472
ORTHOMCL6952
ORTHOMCL8708
ORTHOMCL10166
ORTHOMCL4755
ORTHOMCL6515
ORTHOMCL8683
ORTHOMCL826
ORTHOMCL2616
ORTHOMCL4514
ORTHOMCL2046
ORTHOMCL2692
ORTHOMCL7041
ORTHOMCL1898
ORTHOMCL3611
ORTHOMCL868
ORTHOMCL2210
ORTHOMCL6110
ORTHOMCL6845
ORTHOMCL176
ORTHOMCL1455
ORTHOMCL9245
ORTHOMCL6557
ORTHOMCL10008
ORTHOMCL10475
ORTHOMCL26
ORTHOMCL9457
ORTHOMCL7127
ORTHOMCL9835
ORTHOMCL2159
ORTHOMCL9666
ORTHOMCL5720
ORTHOMCL3594
ORTHOMCL2460
ORTHOMCL6374
ORTHOMCL8746
ORTHOMCL3659
ORTHOMCL5225
ORTHOMCL8885
ORTHOMCL10711
ORTHOMCL2251
ORTHOMCL5137
ORTHOMCL5733
ORTHOMCL6021
ORTHOMCL10518
ORTHOMCL278
ORTHOMCL7182
ORTHOMCL2996
ORTHOMCL7684
ORTHOMCL8229
ORTHOMCL5897
ORTHOMCL6700
ORTHOMCL9261
ORTHOMCL9574
ORTHOMCL5663
ORTHOMCL9230
ORTHOMCL101
ORTHOMCL4863
ORTHOMCL8707
ORTHOMCL9118
ORTHOMCL6527
ORTHOMCL4038
ORTHOMCL3706
ORTHOMCL8921
ORTHOMCL5484
ORTHOMCL6583
ORTHOMCL4678
ORTHOMCL7944
ORTHOMCL2464
ORTHOMCL1523
ORTHOMCL7865
ORTHOMCL7754
ORTHOMCL1547
ORTHOMCL10320
ORTHOMCL1971
ORTHOMCL5073
ORTHOMCL31
ORTHOMCL10041
ORTHOMCL9073
ORTHOMCL10479
ORTHOMCL4213
ORTHOMCL10273
ORTHOMCL7627
ORTHOMCL7486
ORTHOMCL5656
ORTHOMCL7282
ORTHOMCL3191
ORTHOMCL7471
ORTHOMCL7362
ORTHOMCL3605
ORTHOMCL3803
ORTHOMCL153
ORTHOMCL9158
ORTHOMCL2357
ORTHOMCL10597
ORTHOMCL90
ORTHOMCL10133
ORTHOMCL2150
ORTHOMCL10068
ORTHOMCL10573
ORTHOMCL9734
ORTHOMCL3301
ORTHOMCL802
ORTHOMCL4099
ORTHOMCL6546
ORTHOMCL10378
ORTHOMCL9984
ORTHOMCL4808
ORTHOMCL7405
ORTHOMCL5179
ORTHOMCL728
ORTHOMCL2816
ORTHOMCL2134
ORTHOMCL8756
ORTHOMCL9206
ORTHOMCL8800
ORTHOMCL7962
ORTHOMCL7929
ORTHOMCL1987
ORTHOMCL7925
ORTHOMCL2005
ORTHOMCL6232
ORTHOMCL7335
ORTHOMCL10412
ORTHOMCL5781
ORTHOMCL5050
ORTHOMCL7093
ORTHOMCL9639
ORTHOMCL6262
ORTHOMCL4738
ORTHOMCL1902
ORTHOMCL5852
ORTHOMCL7261
ORTHOMCL9276
ORTHOMCL4557
ORTHOMCL4113
ORTHOMCL10893
ORTHOMCL5533
ORTHOMCL8338
ORTHOMCL5284
ORTHOMCL6393
ORTHOMCL10319
ORTHOMCL5343
ORTHOMCL8546
ORTHOMCL3089
ORTHOMCL3111
ORTHOMCL2522
ORTHOMCL9173
ORTHOMCL6277
ORTHOMCL3285
ORTHOMCL5206
ORTHOMCL9900
ORTHOMCL10249
ORTHOMCL10056
ORTHOMCL8073
ORTHOMCL3873
ORTHOMCL5613
ORTHOMCL7469
ORTHOMCL8343
ORTHOMCL6140
ORTHOMCL9034
ORTHOMCL3106
ORTHOMCL4940
ORTHOMCL3133
ORTHOMCL10130
ORTHOMCL194
ORTHOMCL9329
ORTHOMCL466
ORTHOMCL7250
ORTHOMCL1184
ORTHOMCL4819
ORTHOMCL1209
ORTHOMCL10750
ORTHOMCL7680
ORTHOMCL5354
ORTHOMCL7991
ORTHOMCL10173
ORTHOMCL2067
ORTHOMCL10252
ORTHOMCL3636
ORTHOMCL9885
ORTHOMCL1589
ORTHOMCL5917
ORTHOMCL2651
ORTHOMCL393
ORTHOMCL6812
ORTHOMCL210
ORTHOMCL1662
ORTHOMCL4542
ORTHOMCL4822
ORTHOMCL6075
ORTHOMCL9186
ORTHOMCL9350
ORTHOMCL1867
ORTHOMCL6592
ORTHOMCL2596
ORTHOMCL2512
ORTHOMCL6046
ORTHOMCL4837
ORTHOMCL7420
ORTHOMCL7515
ORTHOMCL798
ORTHOMCL1440
ORTHOMCL10598
ORTHOMCL7226
ORTHOMCL676
ORTHOMCL9788
ORTHOMCL4491
ORTHOMCL10416
ORTHOMCL2913
ORTHOMCL1827
ORTHOMCL962
ORTHOMCL7762
ORTHOMCL6165
ORTHOMCL9452
ORTHOMCL7645
ORTHOMCL8469
ORTHOMCL2145
ORTHOMCL6084
ORTHOMCL10800
ORTHOMCL7239
ORTHOMCL4375
ORTHOMCL1195
ORTHOMCL9111
ORTHOMCL5453
ORTHOMCL6079
ORTHOMCL45
ORTHOMCL8051
ORTHOMCL2290
ORTHOMCL2304
ORTHOMCL804
ORTHOMCL7702
ORTHOMCL936
ORTHOMCL9727
ORTHOMCL5936
ORTHOMCL7371
ORTHOMCL2086
ORTHOMCL5197
ORTHOMCL3242
ORTHOMCL4573
ORTHOMCL6923
ORTHOMCL925
ORTHOMCL1569
ORTHOMCL9259
ORTHOMCL10464
ORTHOMCL7014
ORTHOMCL4722
ORTHOMCL6640
ORTHOMCL8879
ORTHOMCL9553
ORTHOMCL5972
ORTHOMCL3194
ORTHOMCL4589
ORTHOMCL4660
ORTHOMCL6237
ORTHOMCL5856
ORTHOMCL2778
ORTHOMCL10150
ORTHOMCL8717
ORTHOMCL2267
ORTHOMCL1983
ORTHOMCL4032
ORTHOMCL9109
ORTHOMCL8935
ORTHOMCL7040
ORTHOMCL477
ORTHOMCL6009
ORTHOMCL7318
ORTHOMCL3688
ORTHOMCL7786
ORTHOMCL7128
ORTHOMCL3019
ORTHOMCL6223
ORTHOMCL6414
ORTHOMCL4870
ORTHOMCL9403
ORTHOMCL6420
ORTHOMCL2985
ORTHOMCL4927
ORTHOMCL3878
ORTHOMCL9756
ORTHOMCL7006
ORTHOMCL9603
ORTHOMCL6371
ORTHOMCL3530
ORTHOMCL7829
ORTHOMCL9345
ORTHOMCL1466
ORTHOMCL2713
ORTHOMCL5696
ORTHOMCL10078
ORTHOMCL851
ORTHOMCL1731
ORTHOMCL8900
ORTHOMCL9443
ORTHOMCL6764
ORTHOMCL8888
ORTHOMCL4441
ORTHOMCL9794
ORTHOMCL303
ORTHOMCL4887
ORTHOMCL7419
ORTHOMCL8027
ORTHOMCL8592
ORTHOMCL4052
ORTHOMCL1725
ORTHOMCL4765
ORTHOMCL1963
ORTHOMCL7525
ORTHOMCL9829
ORTHOMCL10680
ORTHOMCL6917
ORTHOMCL7714
ORTHOMCL9051
ORTHOMCL10564
ORTHOMCL8203
ORTHOMCL7354
ORTHOMCL9395
ORTHOMCL10917
ORTHOMCL6532
ORTHOMCL2225
ORTHOMCL7460
ORTHOMCL5112
ORTHOMCL5449
ORTHOMCL3437
ORTHOMCL6692
ORTHOMCL1657
ORTHOMCL5834
ORTHOMCL8741
ORTHOMCL8456
ORTHOMCL76
ORTHOMCL6226
ORTHOMCL1803
ORTHOMCL3839
ORTHOMCL6337
ORTHOMCL8267
ORTHOMCL364
ORTHOMCL3129
ORTHOMCL10561
ORTHOMCL1744
ORTHOMCL1681
ORTHOMCL5612
ORTHOMCL2615
ORTHOMCL10407
ORTHOMCL9417
ORTHOMCL8047
ORTHOMCL6760
ORTHOMCL8426
ORTHOMCL3425
ORTHOMCL9643
ORTHOMCL2749
ORTHOMCL6350
ORTHOMCL8388
ORTHOMCL1310
ORTHOMCL3468
ORTHOMCL703
ORTHOMCL6955
ORTHOMCL10978
ORTHOMCL4758
ORTHOMCL10929
ORTHOMCL8243
ORTHOMCL8064
ORTHOMCL6296
ORTHOMCL4513
ORTHOMCL5267
ORTHOMCL4485
ORTHOMCL1056
ORTHOMCL8257
ORTHOMCL383
ORTHOMCL6039
ORTHOMCL1543
ORTHOMCL9933
ORTHOMCL10584
ORTHOMCL1153
ORTHOMCL8305
ORTHOMCL5689
ORTHOMCL3266
ORTHOMCL5782
ORTHOMCL3933
ORTHOMCL10253
ORTHOMCL3068
ORTHOMCL4898
ORTHOMCL3929
ORTHOMCL10046
ORTHOMCL1350
ORTHOMCL10482
ORTHOMCL8153
ORTHOMCL6780
ORTHOMCL2411
ORTHOMCL2171
ORTHOMCL7727
ORTHOMCL6875
ORTHOMCL6942
ORTHOMCL1173
ORTHOMCL3851
ORTHOMCL8473
ORTHOMCL3753
ORTHOMCL202
ORTHOMCL413
ORTHOMCL1826
ORTHOMCL3313
ORTHOMCL4603
ORTHOMCL4923
ORTHOMCL5581
ORTHOMCL5526
ORTHOMCL5677
ORTHOMCL3713
ORTHOMCL4931
ORTHOMCL4404
ORTHOMCL3957
ORTHOMCL6206
ORTHOMCL6049
ORTHOMCL10200
ORTHOMCL4344
ORTHOMCL4236
ORTHOMCL8930
ORTHOMCL2202
ORTHOMCL889
ORTHOMCL9281
ORTHOMCL2148
ORTHOMCL7306
ORTHOMCL2299
ORTHOMCL10707
ORTHOMCL4390
ORTHOMCL1166
ORTHOMCL2351
ORTHOMCL8572
ORTHOMCL7790
ORTHOMCL4366
ORTHOMCL9851
ORTHOMCL5268
ORTHOMCL8535
ORTHOMCL918
ORTHOMCL6528
ORTHOMCL4917
ORTHOMCL9334
ORTHOMCL10626
ORTHOMCL3672
ORTHOMCL6005
ORTHOMCL1228
ORTHOMCL4123
ORTHOMCL5504
ORTHOMCL4535
ORTHOMCL1955
ORTHOMCL1375
ORTHOMCL3109
ORTHOMCL3747
ORTHOMCL8083
ORTHOMCL4130
ORTHOMCL5708
ORTHOMCL3674
ORTHOMCL6318
ORTHOMCL10942
ORTHOMCL8939
ORTHOMCL9798
ORTHOMCL6757
ORTHOMCL10497
ORTHOMCL8381
ORTHOMCL29
ORTHOMCL3511
ORTHOMCL4176
ORTHOMCL9572
ORTHOMCL3413
ORTHOMCL1938
ORTHOMCL284
ORTHOMCL4631
ORTHOMCL5019
ORTHOMCL4624
ORTHOMCL9420
ORTHOMCL9695
ORTHOMCL5365
ORTHOMCL6248
ORTHOMCL2653
ORTHOMCL6233
ORTHOMCL3631
ORTHOMCL7423
ORTHOMCL5051
ORTHOMCL1624
ORTHOMCL10285
ORTHOMCL5023
ORTHOMCL6504
ORTHOMCL2363
ORTHOMCL7051
ORTHOMCL10159
ORTHOMCL7376
ORTHOMCL5558
ORTHOMCL6
ORTHOMCL794
ORTHOMCL2409
ORTHOMCL7098
ORTHOMCL1617
ORTHOMCL9020
ORTHOMCL8277
ORTHOMCL4505
ORTHOMCL2930
ORTHOMCL1645
ORTHOMCL5428
ORTHOMCL9882
ORTHOMCL2346
ORTHOMCL213
ORTHOMCL8695
ORTHOMCL3288
ORTHOMCL3922
ORTHOMCL8019
ORTHOMCL8506
ORTHOMCL9311
ORTHOMCL8582
ORTHOMCL5390
ORTHOMCL5312
ORTHOMCL9746
ORTHOMCL1933
ORTHOMCL4501
ORTHOMCL3911
ORTHOMCL10504
ORTHOMCL9680
ORTHOMCL3460
ORTHOMCL7336
ORTHOMCL5541
ORTHOMCL10936
ORTHOMCL8857
ORTHOMCL5403
ORTHOMCL10533
ORTHOMCL2823
ORTHOMCL7895
ORTHOMCL127
ORTHOMCL2565
ORTHOMCL2808
ORTHOMCL9557
ORTHOMCL6551
ORTHOMCL9628
ORTHOMCL1025
ORTHOMCL1635
ORTHOMCL376
ORTHOMCL1179
ORTHOMCL9267
ORTHOMCL1920
ORTHOMCL9627
ORTHOMCL3806
ORTHOMCL9198
ORTHOMCL3228
ORTHOMCL1158
ORTHOMCL6096
ORTHOMCL9220
ORTHOMCL9236
ORTHOMCL5340
ORTHOMCL5739
ORTHOMCL3861
ORTHOMCL10286
ORTHOMCL5620
ORTHOMCL5165
ORTHOMCL8459
ORTHOMCL6276
ORTHOMCL10029
ORTHOMCL539
ORTHOMCL6843
ORTHOMCL9056
ORTHOMCL1882
ORTHOMCL7273
ORTHOMCL8268
ORTHOMCL8065
ORTHOMCL9841
ORTHOMCL7209
ORTHOMCL1915
ORTHOMCL1566
ORTHOMCL3331
ORTHOMCL10356
ORTHOMCL10836
ORTHOMCL2066
ORTHOMCL5530
ORTHOMCL5328
ORTHOMCL5456
ORTHOMCL9400
ORTHOMCL526
ORTHOMCL3722
ORTHOMCL2660
ORTHOMCL4383
ORTHOMCL9248
ORTHOMCL9232
ORTHOMCL9881
ORTHOMCL4144
ORTHOMCL8295
ORTHOMCL6261
ORTHOMCL7826
ORTHOMCL6461
ORTHOMCL7514
ORTHOMCL10211
ORTHOMCL7567
ORTHOMCL405
ORTHOMCL4412
ORTHOMCL10198
ORTHOMCL10262
ORTHOMCL7983
ORTHOMCL8382
ORTHOMCL4347
ORTHOMCL8618
ORTHOMCL10586
ORTHOMCL691
ORTHOMCL6539
ORTHOMCL3126
ORTHOMCL4453
ORTHOMCL2716
ORTHOMCL5465
ORTHOMCL3305
ORTHOMCL3653
ORTHOMCL3286
ORTHOMCL9066
ORTHOMCL10194
ORTHOMCL7096
ORTHOMCL9022
ORTHOMCL6116
ORTHOMCL10174
ORTHOMCL10149
ORTHOMCL128
ORTHOMCL9453
ORTHOMCL7399
ORTHOMCL8235
ORTHOMCL9342
ORTHOMCL3021
ORTHOMCL4221
ORTHOMCL9869
ORTHOMCL3166
ORTHOMCL7327
ORTHOMCL88
ORTHOMCL7746
ORTHOMCL9535
ORTHOMCL7295
ORTHOMCL7849
ORTHOMCL5127
ORTHOMCL1140
ORTHOMCL9921
ORTHOMCL6615
ORTHOMCL5835
ORTHOMCL183
ORTHOMCL843
ORTHOMCL4007
ORTHOMCL98
ORTHOMCL5074
ORTHOMCL9163
ORTHOMCL631
ORTHOMCL7417
ORTHOMCL1432
ORTHOMCL9985
ORTHOMCL10447
ORTHOMCL6603
ORTHOMCL8425
ORTHOMCL2563
ORTHOMCL6645
ORTHOMCL2059
ORTHOMCL4080
ORTHOMCL754
ORTHOMCL5067
ORTHOMCL2332
ORTHOMCL3292
ORTHOMCL3598
ORTHOMCL10581
ORTHOMCL10709
ORTHOMCL3793
ORTHOMCL915
ORTHOMCL651
ORTHOMCL8087
ORTHOMCL4046
ORTHOMCL905
ORTHOMCL10512
ORTHOMCL7007
ORTHOMCL6429
ORTHOMCL8619
ORTHOMCL2322
ORTHOMCL2423
ORTHOMCL5105
ORTHOMCL1325
ORTHOMCL2577
ORTHOMCL2544
ORTHOMCL9890
ORTHOMCL8918
ORTHOMCL6716
ORTHOMCL8545
ORTHOMCL8464
ORTHOMCL5306
ORTHOMCL3844
ORTHOMCL430
ORTHOMCL7454
ORTHOMCL1972
ORTHOMCL1773
ORTHOMCL1946
ORTHOMCL1
ORTHOMCL9418
ORTHOMCL6547
ORTHOMCL3769
ORTHOMCL6148
ORTHOMCL2167
ORTHOMCL2344
ORTHOMCL960
ORTHOMCL9561
ORTHOMCL10499
ORTHOMCL1336
ORTHOMCL91
ORTHOMCL5945
ORTHOMCL6306
ORTHOMCL8522
ORTHOMCL10694
ORTHOMCL5298
ORTHOMCL9189
ORTHOMCL6006
ORTHOMCL8504
ORTHOMCL5528
ORTHOMCL4231
ORTHOMCL8691
ORTHOMCL7057
ORTHOMCL1388
ORTHOMCL4977
ORTHOMCL8379
ORTHOMCL8817
ORTHOMCL3484
ORTHOMCL4431
ORTHOMCL1618
ORTHOMCL8742
ORTHOMCL5588
ORTHOMCL464
ORTHOMCL5402
ORTHOMCL8645
ORTHOMCL710
ORTHOMCL9573
ORTHOMCL749
ORTHOMCL9204
ORTHOMCL1656
ORTHOMCL7080
ORTHOMCL3379
ORTHOMCL4151
ORTHOMCL8833
ORTHOMCL8698
ORTHOMCL5311
ORTHOMCL6822
ORTHOMCL6137
ORTHOMCL2624
ORTHOMCL7192
ORTHOMCL9618
ORTHOMCL6895
ORTHOMCL832
ORTHOMCL7589
ORTHOMCL7940
ORTHOMCL7859
ORTHOMCL470
ORTHOMCL5721
ORTHOMCL6832
ORTHOMCL9917
ORTHOMCL9912
ORTHOMCL9323
ORTHOMCL9180
ORTHOMCL3504
ORTHOMCL3975
ORTHOMCL4442
ORTHOMCL9681
ORTHOMCL1257
ORTHOMCL2753
ORTHOMCL6836
ORTHOMCL9425
ORTHOMCL2232
ORTHOMCL2671
ORTHOMCL4508
ORTHOMCL10534
ORTHOMCL3203
ORTHOMCL5858
ORTHOMCL1215
ORTHOMCL6123
ORTHOMCL9179
ORTHOMCL7738
ORTHOMCL1779
ORTHOMCL6739
ORTHOMCL8162
ORTHOMCL6614
ORTHOMCL9941
ORTHOMCL161
ORTHOMCL10710
ORTHOMCL6649
ORTHOMCL10852
ORTHOMCL4946
ORTHOMCL5056
ORTHOMCL10566
ORTHOMCL10890
ORTHOMCL10305
ORTHOMCL5831
ORTHOMCL10082
ORTHOMCL8207
ORTHOMCL9442
ORTHOMCL44
ORTHOMCL7593
ORTHOMCL7635
ORTHOMCL1693
ORTHOMCL7303
ORTHOMCL8323
ORTHOMCL3578
ORTHOMCL5794
ORTHOMCL7772
ORTHOMCL10961
ORTHOMCL10901
ORTHOMCL5641
ORTHOMCL10269
ORTHOMCL10771
ORTHOMCL2908
ORTHOMCL6891
ORTHOMCL8101
ORTHOMCL6024
ORTHOMCL5322
ORTHOMCL8540
ORTHOMCL7500
ORTHOMCL1829
ORTHOMCL10342
ORTHOMCL8239
ORTHOMCL2098
ORTHOMCL6861
ORTHOMCL1094
ORTHOMCL7605
ORTHOMCL3813
ORTHOMCL4696
ORTHOMCL6353
ORTHOMCL9789
ORTHOMCL4487
ORTHOMCL10700
ORTHOMCL10579
ORTHOMCL6639
ORTHOMCL5422
ORTHOMCL1227
ORTHOMCL8934
ORTHOMCL10180
ORTHOMCL2149
ORTHOMCL6424
ORTHOMCL3004
ORTHOMCL9610
ORTHOMCL7988
ORTHOMCL9040
ORTHOMCL10993
ORTHOMCL3261
ORTHOMCL1742
ORTHOMCL1727
ORTHOMCL10465
ORTHOMCL3061
ORTHOMCL10621
ORTHOMCL7345
ORTHOMCL4318
ORTHOMCL1872
ORTHOMCL7368
ORTHOMCL1353
ORTHOMCL8215
ORTHOMCL9052
ORTHOMCL2885
ORTHOMCL5787
ORTHOMCL6169
ORTHOMCL3451
ORTHOMCL10103
ORTHOMCL5470
ORTHOMCL4965
ORTHOMCL3341
ORTHOMCL3224
ORTHOMCL2370
ORTHOMCL967
ORTHOMCL7531
ORTHOMCL5800
ORTHOMCL3152
ORTHOMCL9990
ORTHOMCL1200
ORTHOMCL6059
ORTHOMCL8603
ORTHOMCL6205
ORTHOMCL5632
ORTHOMCL3950
ORTHOMCL8534
ORTHOMCL10291
ORTHOMCL1465
ORTHOMCL5601
ORTHOMCL1512
ORTHOMCL687
ORTHOMCL2863
ORTHOMCL8143
ORTHOMCL8882
ORTHOMCL1491
ORTHOMCL1876
ORTHOMCL6293
ORTHOMCL1866
ORTHOMCL8834
ORTHOMCL2770
ORTHOMCL984
ORTHOMCL10410
ORTHOMCL6300
ORTHOMCL8106
ORTHOMCL337
ORTHOMCL10191
ORTHOMCL2111
ORTHOMCL6704
ORTHOMCL3193
ORTHOMCL5104
ORTHOMCL2782
ORTHOMCL7436
ORTHOMCL997
ORTHOMCL40
ORTHOMCL165
ORTHOMCL10687
ORTHOMCL5071
ORTHOMCL6141
ORTHOMCL7778
ORTHOMCL186
ORTHOMCL6569
ORTHOMCL7752
ORTHOMCL10228
ORTHOMCL2205
ORTHOMCL6193
ORTHOMCL10065
ORTHOMCL9694
ORTHOMCL481
ORTHOMCL3408
ORTHOMCL1045
ORTHOMCL3616
ORTHOMCL404
ORTHOMCL7990
ORTHOMCL9823
ORTHOMCL10039
ORTHOMCL5664
ORTHOMCL9962
ORTHOMCL2485
ORTHOMCL9197
ORTHOMCL4002
ORTHOMCL8115
ORTHOMCL4276
ORTHOMCL8172
ORTHOMCL9716
ORTHOMCL10529
ORTHOMCL7168
ORTHOMCL6018
ORTHOMCL10057
ORTHOMCL2083
ORTHOMCL5540
ORTHOMCL3752
ORTHOMCL7446
ORTHOMCL4468
ORTHOMCL1885
ORTHOMCL9925
ORTHOMCL3382
ORTHOMCL8813
ORTHOMCL8505
ORTHOMCL8664
ORTHOMCL10869
ORTHOMCL10927
ORTHOMCL9240
ORTHOMCL9438
ORTHOMCL8219
ORTHOMCL767
ORTHOMCL6576
ORTHOMCL1840
ORTHOMCL3250
ORTHOMCL974
ORTHOMCL268
ORTHOMCL7858
ORTHOMCL7631
ORTHOMCL5122
ORTHOMCL10982
ORTHOMCL6987
ORTHOMCL2279
ORTHOMCL1665
ORTHOMCL658
ORTHOMCL68
ORTHOMCL5590
ORTHOMCL7625
ORTHOMCL299
ORTHOMCL3350
ORTHOMCL1687
ORTHOMCL4353
ORTHOMCL9580
ORTHOMCL781
ORTHOMCL4856
ORTHOMCL7619
ORTHOMCL412
ORTHOMCL3355
ORTHOMCL8771
ORTHOMCL8345
ORTHOMCL8460
ORTHOMCL6872
ORTHOMCL5346
ORTHOMCL10086
ORTHOMCL10279
ORTHOMCL3108
ORTHOMCL9268
ORTHOMCL2311
ORTHOMCL4689
ORTHOMCL7882
ORTHOMCL2496
ORTHOMCL4899
ORTHOMCL9802
ORTHOMCL3316
ORTHOMCL1916
ORTHOMCL1450
ORTHOMCL9750
ORTHOMCL10254
ORTHOMCL10637
ORTHOMCL6377
ORTHOMCL4555
ORTHOMCL4045
ORTHOMCL6941
ORTHOMCL4073
ORTHOMCL3732
ORTHOMCL6162
ORTHOMCL1071
ORTHOMCL1719
ORTHOMCL9079
ORTHOMCL6754
ORTHOMCL8128
ORTHOMCL10747
ORTHOMCL9143
ORTHOMCL4666
ORTHOMCL5970
ORTHOMCL1702
ORTHOMCL9103
ORTHOMCL6529
ORTHOMCL4876
ORTHOMCL6064
ORTHOMCL4532
ORTHOMCL10806
ORTHOMCL196
ORTHOMCL7788
ORTHOMCL5064
ORTHOMCL3398
ORTHOMCL4632
ORTHOMCL5481
ORTHOMCL599
ORTHOMCL8097
ORTHOMCL2245
ORTHOMCL6879
ORTHOMCL7262
ORTHOMCL10563
ORTHOMCL3443
ORTHOMCL10934
ORTHOMCL228
ORTHOMCL6041
ORTHOMCL5152
ORTHOMCL7612
ORTHOMCL10914
ORTHOMCL5790
ORTHOMCL5880
ORTHOMCL7243
ORTHOMCL6938
ORTHOMCL1598
ORTHOMCL10171
ORTHOMCL5373
ORTHOMCL2333
ORTHOMCL8654
ORTHOMCL6728
ORTHOMCL5611
ORTHOMCL1007
ORTHOMCL10456
ORTHOMCL3257
ORTHOMCL590
ORTHOMCL306
ORTHOMCL4118
ORTHOMCL8634
ORTHOMCL6483
ORTHOMCL6198
ORTHOMCL7912
ORTHOMCL7994
ORTHOMCL1462
ORTHOMCL9185
ORTHOMCL7421
ORTHOMCL10731
ORTHOMCL6827
ORTHOMCL9527
ORTHOMCL3216
ORTHOMCL3401
ORTHOMCL10470
ORTHOMCL8304
ORTHOMCL4840
ORTHOMCL5036
ORTHOMCL5949
ORTHOMCL6144
ORTHOMCL7175
ORTHOMCL1039
ORTHOMCL2929
ORTHOMCL3778
ORTHOMCL2272
ORTHOMCL7771
ORTHOMCL9031
ORTHOMCL4759
ORTHOMCL3349
ORTHOMCL10666
ORTHOMCL5314
ORTHOMCL8975
ORTHOMCL9174
ORTHOMCL10906
ORTHOMCL5868
ORTHOMCL1909
ORTHOMCL5088
ORTHOMCL10383
ORTHOMCL10820
ORTHOMCL3881
ORTHOMCL5149
ORTHOMCL7117
ORTHOMCL2802
ORTHOMCL3219
ORTHOMCL10880
ORTHOMCL6686
ORTHOMCL9017
ORTHOMCL7475
ORTHOMCL10728
ORTHOMCL5961
ORTHOMCL6120
ORTHOMCL6434
ORTHOMCL6738
ORTHOMCL2675
ORTHOMCL10846
ORTHOMCL10083
ORTHOMCL6166
ORTHOMCL9396
ORTHOMCL604
ORTHOMCL6544
ORTHOMCL2602
ORTHOMCL4159
ORTHOMCL6807
ORTHOMCL725
ORTHOMCL696
ORTHOMCL7495
ORTHOMCL5958
ORTHOMCL7154
ORTHOMCL1076
ORTHOMCL1387
ORTHOMCL9809
ORTHOMCL763
ORTHOMCL10599
ORTHOMCL10373
ORTHOMCL10064
ORTHOMCL10630
ORTHOMCL10298
ORTHOMCL8537
ORTHOMCL10491
ORTHOMCL5169
ORTHOMCL6297
ORTHOMCL2762
ORTHOMCL4933
ORTHOMCL5606
ORTHOMCL5253
ORTHOMCL1085
ORTHOMCL8830
ORTHOMCL10323
ORTHOMCL2974
ORTHOMCL3092
ORTHOMCL1792
ORTHOMCL4835
ORTHOMCL1244
ORTHOMCL1578
ORTHOMCL8374
ORTHOMCL5984
ORTHOMCL4725
ORTHOMCL4249
ORTHOMCL4182
ORTHOMCL145
ORTHOMCL7713
ORTHOMCL1986
ORTHOMCL10185
ORTHOMCL1406
ORTHOMCL3637
ORTHOMCL4693
ORTHOMCL6312
ORTHOMCL1748
ORTHOMCL898
ORTHOMCL9604
ORTHOMCL1809
ORTHOMCL3558
ORTHOMCL10678
ORTHOMCL8871
ORTHOMCL3717
ORTHOMCL5507
ORTHOMCL276
ORTHOMCL5550
ORTHOMCL10811
ORTHOMCL6224
ORTHOMCL9697
ORTHOMCL5982
ORTHOMCL8424
ORTHOMCL5412
ORTHOMCL4121
ORTHOMCL7052
ORTHOMCL1507
ORTHOMCL8624
ORTHOMCL3749
ORTHOMCL9397
ORTHOMCL1805
ORTHOMCL2331
ORTHOMCL4211
ORTHOMCL6234
ORTHOMCL7008
ORTHOMCL3025
ORTHOMCL7032
ORTHOMCL5368
ORTHOMCL9903
ORTHOMCL10186
ORTHOMCL9093
ORTHOMCL10310
ORTHOMCL4365
ORTHOMCL3394
ORTHOMCL342
ORTHOMCL10329
ORTHOMCL9857
ORTHOMCL6345
ORTHOMCL9332
ORTHOMCL1790
ORTHOMCL8224
ORTHOMCL4889
ORTHOMCL4103
ORTHOMCL10587
ORTHOMCL7838
ORTHOMCL10317
ORTHOMCL1404
ORTHOMCL2964
ORTHOMCL10513
ORTHOMCL4245
ORTHOMCL2433
ORTHOMCL8184
ORTHOMCL6585
ORTHOMCL333
ORTHOMCL6470
ORTHOMCL189
ORTHOMCL2012
ORTHOMCL1786
ORTHOMCL873
ORTHOMCL56
ORTHOMCL6793
ORTHOMCL5842
ORTHOMCL2132
ORTHOMCL3879
ORTHOMCL3953
ORTHOMCL7569
ORTHOMCL7308
ORTHOMCL9116
ORTHOMCL1468
ORTHOMCL10108
ORTHOMCL10652
ORTHOMCL4230
ORTHOMCL155
ORTHOMCL887
ORTHOMCL10292
ORTHOMCL3444
ORTHOMCL7364
ORTHOMCL1759
ORTHOMCL5450
ORTHOMCL7580
ORTHOMCL10040
ORTHOMCL4616
ORTHOMCL4651
ORTHOMCL1774
ORTHOMCL6189
ORTHOMCL1567
ORTHOMCL1033
ORTHOMCL6839
ORTHOMCL10990
ORTHOMCL669
ORTHOMCL374
ORTHOMCL3805
ORTHOMCL10054
ORTHOMCL3488
ORTHOMCL1024
ORTHOMCL6652
ORTHOMCL9514
ORTHOMCL8710
ORTHOMCL6835
ORTHOMCL52
ORTHOMCL8438
ORTHOMCL2179
ORTHOMCL10908
ORTHOMCL4939
ORTHOMCL1029
ORTHOMCL7546
ORTHOMCL3268
ORTHOMCL9322
ORTHOMCL7522
ORTHOMCL5310
ORTHOMCL6868
ORTHOMCL4343
ORTHOMCL5572
ORTHOMCL6176
ORTHOMCL7257
ORTHOMCL282
ORTHOMCL9999
ORTHOMCL10935
ORTHOMCL1535
ORTHOMCL6824
ORTHOMCL8564
ORTHOMCL2107
ORTHOMCL4111
ORTHOMCL3921
ORTHOMCL6395
ORTHOMCL8108
ORTHOMCL4348
ORTHOMCL10454
ORTHOMCL6401
ORTHOMCL6814
ORTHOMCL5556
ORTHOMCL7611
ORTHOMCL6624
ORTHOMCL10072
ORTHOMCL217
ORTHOMCL2268
ORTHOMCL8095
ORTHOMCL4839
ORTHOMCL1304
ORTHOMCL6999
ORTHOMCL4824
ORTHOMCL2598
ORTHOMCL10757
ORTHOMCL7747
ORTHOMCL10891
ORTHOMCL6709
ORTHOMCL7263
ORTHOMCL7600
ORTHOMCL3434
ORTHOMCL4049
ORTHOMCL6725
ORTHOMCL8471
ORTHOMCL1186
ORTHOMCL10175
ORTHOMCL6019
ORTHOMCL5486
ORTHOMCL7711
ORTHOMCL6033
ORTHOMCL10484
ORTHOMCL5466
ORTHOMCL1088
ORTHOMCL3931
ORTHOMCL5671
ORTHOMCL8675
ORTHOMCL6142
ORTHOMCL9454
ORTHOMCL7936
ORTHOMCL6445
ORTHOMCL4290
ORTHOMCL6899
ORTHOMCL3963
ORTHOMCL10514
ORTHOMCL9108
ORTHOMCL1317
ORTHOMCL1752
ORTHOMCL2970
ORTHOMCL7398
ORTHOMCL5228
ORTHOMCL3823
ORTHOMCL3311
ORTHOMCL5509
ORTHOMCL1878
ORTHOMCL9588
ORTHOMCL9041
ORTHOMCL4416
ORTHOMCL8120
ORTHOMCL4061
ORTHOMCL6423
ORTHOMCL7039
ORTHOMCL4458
ORTHOMCL8174
ORTHOMCL5347
ORTHOMCL6340
ORTHOMCL2776
ORTHOMCL2106
ORTHOMCL10442
ORTHOMCL1475
ORTHOMCL9608
ORTHOMCL3666
ORTHOMCL7840
ORTHOMCL6517
ORTHOMCL9053
ORTHOMCL3378
ORTHOMCL8457
ORTHOMCL3845
ORTHOMCL8942
ORTHOMCL2361
ORTHOMCL8690
ORTHOMCL743
ORTHOMCL1270
ORTHOMCL7492
ORTHOMCL1935
ORTHOMCL24
ORTHOMCL2233
ORTHOMCL1655
ORTHOMCL9167
ORTHOMCL9689
ORTHOMCL5594
ORTHOMCL2252
ORTHOMCL6920
ORTHOMCL2416
ORTHOMCL1003
ORTHOMCL3234
ORTHOMCL6338
ORTHOMCL5180
ORTHOMCL5991
ORTHOMCL9458
ORTHOMCL6476
ORTHOMCL5379
ORTHOMCL6804
ORTHOMCL9991
ORTHOMCL569
ORTHOMCL8644
ORTHOMCL10197
ORTHOMCL2984
ORTHOMCL9235
ORTHOMCL7276
ORTHOMCL2795
ORTHOMCL6349
ORTHOMCL7832
ORTHOMCL5454
ORTHOMCL9702
ORTHOMCL7462
ORTHOMCL489
ORTHOMCL117
ORTHOMCL10090
ORTHOMCL273
ORTHOMCL1581
ORTHOMCL3467
ORTHOMCL4960
ORTHOMCL8032
ORTHOMCL3683
ORTHOMCL1233
ORTHOMCL2611
ORTHOMCL3204
ORTHOMCL9239
ORTHOMCL9668
ORTHOMCL327
ORTHOMCL7739
ORTHOMCL5014
ORTHOMCL8066
ORTHOMCL707
ORTHOMCL8446
ORTHOMCL8961
ORTHOMCL3405
ORTHOMCL6241
ORTHOMCL3884
ORTHOMCL2125
ORTHOMCL10036
ORTHOMCL9258
ORTHOMCL2117
ORTHOMCL6147
ORTHOMCL2297
ORTHOMCL10398
ORTHOMCL10662
ORTHOMCL6633
ORTHOMCL7998
ORTHOMCL7372
ORTHOMCL8972
ORTHOMCL6678
ORTHOMCL5094
ORTHOMCL2223
ORTHOMCL1109
ORTHOMCL2848
ORTHOMCL10230
ORTHOMCL3618
ORTHOMCL5832
ORTHOMCL8227
ORTHOMCL2380
ORTHOMCL78
ORTHOMCL9968
ORTHOMCL1925
ORTHOMCL5908
ORTHOMCL9920
ORTHOMCL6579
ORTHOMCL3654
ORTHOMCL3581
ORTHOMCL6888
ORTHOMCL10193
ORTHOMCL689
ORTHOMCL7132
ORTHOMCL4137
ORTHOMCL1600
ORTHOMCL8666
ORTHOMCL1733
ORTHOMCL262
ORTHOMCL8744
ORTHOMCL423
ORTHOMCL1593
ORTHOMCL10627
ORTHOMCL10117
ORTHOMCL4644
ORTHOMCL10031
ORTHOMCL2182
ORTHOMCL1149
ORTHOMCL5725
ORTHOMCL6427
ORTHOMCL2998
ORTHOMCL5409
ORTHOMCL7310
ORTHOMCL8017
ORTHOMCL4932
ORTHOMCL2340
ORTHOMCL7695
ORTHOMCL1221
ORTHOMCL7288
ORTHOMCL1686
ORTHOMCL5164
ORTHOMCL2317
ORTHOMCL2765
ORTHOMCL7470
ORTHOMCL4044
ORTHOMCL10297
ORTHOMCL6750
ORTHOMCL5212
ORTHOMCL6030
ORTHOMCL5123
ORTHOMCL3512
ORTHOMCL1977
ORTHOMCL9982
ORTHOMCL3157
ORTHOMCL4919
ORTHOMCL5471
ORTHOMCL3315
ORTHOMCL880
ORTHOMCL2751
ORTHOMCL1579
ORTHOMCL10571
ORTHOMCL7369
ORTHOMCL5679
ORTHOMCL3367
ORTHOMCL9321
ORTHOMCL3559
ORTHOMCL890
ORTHOMCL195
ORTHOMCL8418
ORTHOMCL7877
ORTHOMCL2521
ORTHOMCL1359
ORTHOMCL8559
ORTHOMCL8396
ORTHOMCL8151
ORTHOMCL4533
ORTHOMCL4072
ORTHOMCL7414
ORTHOMCL10239
ORTHOMCL6755
ORTHOMCL6978
ORTHOMCL1008
ORTHOMCL9614
ORTHOMCL2043
ORTHOMCL10702
ORTHOMCL5987
ORTHOMCL5249
ORTHOMCL2353
ORTHOMCL6268
ORTHOMCL4364
ORTHOMCL9351
ORTHOMCL7078
ORTHOMCL6053
ORTHOMCL445
ORTHOMCL7136
ORTHOMCL8701
ORTHOMCL8145
ORTHOMCL787
ORTHOMCL7407
ORTHOMCL6443
ORTHOMCL2528
ORTHOMCL9277
ORTHOMCL5010
ORTHOMCL7818
ORTHOMCL401
ORTHOMCL593
ORTHOMCL6939
ORTHOMCL7537
ORTHOMCL7968
ORTHOMCL3565
ORTHOMCL4951
ORTHOMCL10549
ORTHOMCL8615
ORTHOMCL227
ORTHOMCL394
ORTHOMCL1904
ORTHOMCL1619
ORTHOMCL9025
ORTHOMCL9868
ORTHOMCL2963
ORTHOMCL5352
ORTHOMCL9594
ORTHOMCL4481
ORTHOMCL4600
ORTHOMCL4599
ORTHOMCL7993
ORTHOMCL6621
ORTHOMCL7637
ORTHOMCL4188
ORTHOMCL5186
ORTHOMCL6876
ORTHOMCL5839
ORTHOMCL510
ORTHOMCL10938
ORTHOMCL1189
ORTHOMCL8002
ORTHOMCL10026
ORTHOMCL8812
ORTHOMCL3751
ORTHOMCL8859
ORTHOMCL6172
ORTHOMCL7897
ORTHOMCL4156
ORTHOMCL10501
ORTHOMCL4095
ORTHOMCL2825
ORTHOMCL2921
ORTHOMCL1931
ORTHOMCL3509
ORTHOMCL3819
ORTHOMCL1023
ORTHOMCL1038
ORTHOMCL1643
ORTHOMCL7252
ORTHOMCL3924
ORTHOMCL3270
ORTHOMCL1463
ORTHOMCL3081
ORTHOMCL722
ORTHOMCL6590
ORTHOMCL3201
ORTHOMCL4205
ORTHOMCL8665
ORTHOMCL9132
ORTHOMCL8693
ORTHOMCL1167
ORTHOMCL8594
ORTHOMCL9739
ORTHOMCL7939
ORTHOMCL10809
ORTHOMCL6880
ORTHOMCL4688
ORTHOMCL10971
ORTHOMCL4498
ORTHOMCL2300
ORTHOMCL8245
ORTHOMCL5542
ORTHOMCL7207
ORTHOMCL1580
ORTHOMCL4575
ORTHOMCL7700
ORTHOMCL2801
ORTHOMCL5451
ORTHOMCL7297
ORTHOMCL3626
ORTHOMCL2918
ORTHOMCL469
ORTHOMCL8404
ORTHOMCL1894
ORTHOMCL3116
ORTHOMCL10556
ORTHOMCL6082
ORTHOMCL3456
ORTHOMCL7972
ORTHOMCL8772
ORTHOMCL4841
ORTHOMCL8792
ORTHOMCL4410
ORTHOMCL5824
ORTHOMCL3303
ORTHOMCL6618
ORTHOMCL6167
ORTHOMCL9269
ORTHOMCL10414
ORTHOMCL10576
ORTHOMCL6801
ORTHOMCL167
ORTHOMCL387
ORTHOMCL6307
ORTHOMCL9303
ORTHOMCL4248
ORTHOMCL545
ORTHOMCL4580
ORTHOMCL8953
ORTHOMCL10693
ORTHOMCL3499
ORTHOMCL8375
ORTHOMCL8653
ORTHOMCL8763
ORTHOMCL10437
ORTHOMCL6219
ORTHOMCL10883
ORTHOMCL4334
ORTHOMCL2569
ORTHOMCL1084
ORTHOMCL2036
ORTHOMCL9257
ORTHOMCL6609
ORTHOMCL5938
ORTHOMCL7585
ORTHOMCL5760
ORTHOMCL277
ORTHOMCL6225
ORTHOMCL4089
ORTHOMCL1289
ORTHOMCL2482
ORTHOMCL1369
ORTHOMCL4305
ORTHOMCL7647
ORTHOMCL1485
ORTHOMCL9827
ORTHOMCL7907
ORTHOMCL324
ORTHOMCL10915
ORTHOMCL5914
ORTHOMCL629
ORTHOMCL2334
ORTHOMCL4054
ORTHOMCL521
ORTHOMCL9498
ORTHOMCL10562
ORTHOMCL3619
ORTHOMCL1782
ORTHOMCL3000
ORTHOMCL3826
ORTHOMCL10682
ORTHOMCL8250
ORTHOMCL6694
ORTHOMCL305
ORTHOMCL4520
ORTHOMCL10741
ORTHOMCL2007
ORTHOMCL981
ORTHOMCL4459
ORTHOMCL10266
ORTHOMCL2662
ORTHOMCL4712
ORTHOMCL7563
ORTHOMCL959
ORTHOMCL10774
ORTHOMCL9605
ORTHOMCL5701
ORTHOMCL3017
ORTHOMCL10147
ORTHOMCL574
ORTHOMCL3074
ORTHOMCL3817
ORTHOMCL9621
ORTHOMCL8414
ORTHOMCL2501
ORTHOMCL5279
ORTHOMCL3651
ORTHOMCL5482
ORTHOMCL10124
ORTHOMCL7374
ORTHOMCL3986
ORTHOMCL2994
ORTHOMCL6575
ORTHOMCL3407
ORTHOMCL529
ORTHOMCL6252
ORTHOMCL3381
ORTHOMCL5431
ORTHOMCL10732
ORTHOMCL4515
ORTHOMCL7004
ORTHOMCL8269
ORTHOMCL8346
ORTHOMCL8783
ORTHOMCL6013
ORTHOMCL9717
ORTHOMCL6710
ORTHOMCL8327
ORTHOMCL74
ORTHOMCL9196
ORTHOMCL9924
ORTHOMCL8498
ORTHOMCL5069
ORTHOMCL11001
ORTHOMCL9656
ORTHOMCL7587
ORTHOMCL2567
ORTHOMCL1932
ORTHOMCL2824
ORTHOMCL27
ORTHOMCL9260
ORTHOMCL9148
ORTHOMCL1093
ORTHOMCL8856
ORTHOMCL8393
ORTHOMCL2515
ORTHOMCL834
ORTHOMCL10248
ORTHOMCL9895
ORTHOMCL7894
ORTHOMCL1903
ORTHOMCL9312
ORTHOMCL6100
ORTHOMCL6153
ORTHOMCL8140
ORTHOMCL214
ORTHOMCL9952
ORTHOMCL2126
ORTHOMCL7330
ORTHOMCL5605
ORTHOMCL2479
ORTHOMCL2248
ORTHOMCL6970
ORTHOMCL8275
ORTHOMCL3095
ORTHOMCL8111
ORTHOMCL2603
ORTHOMCL5562
ORTHOMCL10881
ORTHOMCL206
ORTHOMCL3327
ORTHOMCL9512
ORTHOMCL9251
ORTHOMCL4009
ORTHOMCL1131
ORTHOMCL772
ORTHOMCL3595
ORTHOMCL4000
ORTHOMCL1180
ORTHOMCL1969
ORTHOMCL7573
ORTHOMCL6906
ORTHOMCL5338
ORTHOMCL1601
ORTHOMCL9807
ORTHOMCL9363
ORTHOMCL9421
ORTHOMCL5336
ORTHOMCL5750
ORTHOMCL7595
ORTHOMCL5058
ORTHOMCL7268
ORTHOMCL7668
ORTHOMCL5767
ORTHOMCL2396
ORTHOMCL8450
ORTHOMCL6696
ORTHOMCL10349
ORTHOMCL955
ORTHOMCL2702
ORTHOMCL415
ORTHOMCL8932
ORTHOMCL9009
ORTHOMCL10061
ORTHOMCL8831
ORTHOMCL8745
ORTHOMCL4982
ORTHOMCL892
ORTHOMCL9382
ORTHOMCL3380
ORTHOMCL5510
ORTHOMCL6993
ORTHOMCL3719
ORTHOMCL2417
ORTHOMCL4929
ORTHOMCL6367
ORTHOMCL345
ORTHOMCL3978
ORTHOMCL3815
ORTHOMCL5508
ORTHOMCL2441
ORTHOMCL8510
ORTHOMCL2784
ORTHOMCL2032
ORTHOMCL8574
ORTHOMCL559
ORTHOMCL4657
ORTHOMCL5726
ORTHOMCL8655
ORTHOMCL8335
ORTHOMCL4727
ORTHOMCL10773
ORTHOMCL2051
ORTHOMCL2530
ORTHOMCL6320
ORTHOMCL3834
ORTHOMCL1246
ORTHOMCL6050
ORTHOMCL4178
ORTHOMCL7509
ORTHOMCL769
ORTHOMCL10608
ORTHOMCL8340
ORTHOMCL8376
ORTHOMCL4440
ORTHOMCL2274
ORTHOMCL6896
ORTHOMCL2372
ORTHOMCL4601
ORTHOMCL9113
ORTHOMCL5963
ORTHOMCL10274
ORTHOMCL6805
ORTHOMCL8435
ORTHOMCL5480
ORTHOMCL6989
ORTHOMCL4807
ORTHOMCL9833
ORTHOMCL8896
ORTHOMCL727
ORTHOMCL7404
ORTHOMCL8864
ORTHOMCL8920
ORTHOMCL7766
ORTHOMCL1608
ORTHOMCL389
ORTHOMCL4761
ORTHOMCL4127
ORTHOMCL6514
ORTHOMCL6222
ORTHOMCL5702
ORTHOMCL1372
ORTHOMCL740
ORTHOMCL8605
ORTHOMCL8689
ORTHOMCL9391
ORTHOMCL5217
ORTHOMCL4948
ORTHOMCL10699
ORTHOMCL6748
ORTHOMCL9790
ORTHOMCL5780
ORTHOMCL1288
ORTHOMCL6682
ORTHOMCL1670
ORTHOMCL4316
ORTHOMCL1453
ORTHOMCL9766
ORTHOMCL3866
ORTHOMCL9039
ORTHOMCL9432
ORTHOMCL10076
ORTHOMCL9714
ORTHOMCL123
ORTHOMCL2213
ORTHOMCL4466
[truncated: 7,661 more rows]
