# Supplementary material for: Comparative transcriptome provides strategy for phylogenetic analysis and SSR marker development in Chaenomeles
Source: Research Square preprint supplement (doi:10.21203/rs.3.rs-393262/v1), 2021-04-12
Supplement: Supplementary file 12 [file 1a736e91509f2658f2405652.xlsx]

## Sheet: Supplementary Table S7
Common single-copy genes containing SSR sites in 10 Chaenomeles germplams
ORTHOMCL ID	XZ	ZPLP	GP	MYXZ	MY	RB	XZSS	ZPCA	ZPXC	ZPLY
ORTHOMCL9975	Unigene0008033	Unigene0043828	Unigene0032995	Unigene0011131	Unigene0008650	Unigene0008505	Unigene0018225	Unigene0024159	Unigene0008485	Unigene0031835
ORTHOMCL4798	Unigene0034481	Unigene0023078	Unigene0031959	Unigene0011137	Unigene0002769	Unigene0026167	Unigene0028727	Unigene0004930	Unigene0000194	Unigene0037712
ORTHOMCL10525	Unigene0024497	Unigene0014863	Unigene0040523	Unigene0023340	Unigene0038736	Unigene0047467	Unigene0036501	Unigene0012796	Unigene0045710	Unigene0026094
ORTHOMCL10458	Unigene0028198	Unigene0044139	Unigene0027536	Unigene0019754	Unigene0017436	Unigene0032974	Unigene0025503	Unigene0016656	Unigene0014443	Unigene0025371
ORTHOMCL10031	Unigene0026644	Unigene0029427	Unigene0028309	Unigene0036778	Unigene0036050	Unigene0043662	Unigene0028179	Unigene0008314	Unigene0041797	Unigene0030107
ORTHOMCL8573	Unigene0017786	Unigene0015865	Unigene0034981	Unigene0048684	Unigene0035539	Unigene0045765	Unigene0005572	Unigene0014470	Unigene0038116	Unigene0003952
ORTHOMCL5340	Unigene0032762	Unigene0000657	Unigene0031065	Unigene0001169	Unigene0021384	Unigene0044359	Unigene0034864	Unigene0032342	Unigene0000733	Unigene0000682
ORTHOMCL5503	Unigene0013077	Unigene0015502	Unigene0000938	Unigene0007630	Unigene0013895	Unigene0008774	Unigene0008073	Unigene0002720	Unigene0048463	Unigene0044783
ORTHOMCL10468	Unigene0030212	Unigene0045916	Unigene0015842	Unigene0036841	Unigene0027318	Unigene0041882	Unigene0038932	Unigene0035519	Unigene0041714	Unigene0034337
ORTHOMCL4932	Unigene0039233	Unigene0044433	Unigene0000269	Unigene0003430	Unigene0027617	Unigene0028383	Unigene0032953	Unigene0042755	Unigene0023529	Unigene0003056
ORTHOMCL8901	Unigene0030226	Unigene0028667	Unigene0017317	Unigene0048512	Unigene0032958	Unigene0004812	Unigene0016744	Unigene0042271	Unigene0040342	Unigene0004549
ORTHOMCL10077	Unigene0008586	Unigene0040915	Unigene0042561	Unigene0021936	Unigene0018471	Unigene0027326	Unigene0030715	Unigene0029906	Unigene0026834	Unigene0040032
ORTHOMCL8026	Unigene0015392	Unigene0003252	Unigene0022131	Unigene0009480	Unigene0021745	Unigene0045634	Unigene0010935	Unigene0017323	Unigene0045982	Unigene0008975
ORTHOMCL8459	Unigene0009178	Unigene0025392	Unigene0021419	Unigene0013667	Unigene0036698	Unigene0003787	Unigene0032900	Unigene0021669	Unigene0018774	Unigene0014654
ORTHOMCL9301	Unigene0039258	Unigene0027028	Unigene0005776	Unigene0012500	Unigene0032005	Unigene0024372	Unigene0005412	Unigene0012119	Unigene0031232	Unigene0022230
ORTHOMCL5075	Unigene0037631	Unigene0043014	Unigene0017897	Unigene0045534	Unigene0034401	Unigene0000385	Unigene0004014	Unigene0002076	Unigene0009320	Unigene0027880
ORTHOMCL5691	Unigene0001187	Unigene0022058	Unigene0016521	Unigene0029084	Unigene0031761	Unigene0017124	Unigene0018552	Unigene0042003	Unigene0041374	Unigene0008925
ORTHOMCL10244	Unigene0040359	Unigene0045486	Unigene0036098	Unigene0046526	Unigene0034828	Unigene0023992	Unigene0039258	Unigene0044237	Unigene0048328	Unigene0009985
ORTHOMCL7239	Unigene0005671	Unigene0011707	Unigene0005932	Unigene0021188	Unigene0031284	Unigene0030152	Unigene0017374	Unigene0014884	Unigene0024310	Unigene0039209
ORTHOMCL7470	Unigene0043465	Unigene0041235	Unigene0005700	Unigene0017698	Unigene0026173	Unigene0004018	Unigene0002669	Unigene0007475	Unigene0027505	Unigene0041910
ORTHOMCL9434	Unigene0024006	Unigene0025856	Unigene0026501	Unigene0005805	Unigene0018137	Unigene0025338	Unigene0024748	Unigene0020628	Unigene0035552	Unigene0021710
ORTHOMCL10153	Unigene0032211	Unigene0009165	Unigene0023452	Unigene0035007	Unigene0030128	Unigene0036161	Unigene0023203	Unigene0022586	Unigene0010008	Unigene0012598
ORTHOMCL4536	Unigene0000624	Unigene0040319	Unigene0000389	Unigene0000065	Unigene0000477	Unigene0001390	Unigene0000480	Unigene0000108	Unigene0000446	Unigene0000525
ORTHOMCL8358	Unigene0012903	Unigene0011570	Unigene0031810	Unigene0016416	Unigene0005772	Unigene0003646	Unigene0015686	Unigene0029049	Unigene0023046	Unigene0027690
ORTHOMCL10048	Unigene0035464	Unigene0035785	Unigene0034592	Unigene0008396	Unigene0022251	Unigene0032412	Unigene0038017	Unigene0030706	Unigene0028907	Unigene0038604
ORTHOMCL6750	Unigene0040461	Unigene0006229	Unigene0041917	Unigene0042319	Unigene0035113	Unigene0004167	Unigene0023611	Unigene0002767	Unigene0038124	Unigene0002026
ORTHOMCL5636	Unigene0029705	Unigene0042671	Unigene0036343	Unigene0031539	Unigene0032804	Unigene0007661	Unigene0022051	Unigene0010907	Unigene0030982	Unigene0028129
ORTHOMCL6168	Unigene0002712	Unigene0003667	Unigene0039851	Unigene0047832	Unigene0039059	Unigene0013974	Unigene0007588	Unigene0002141	Unigene0001570	Unigene0004235
ORTHOMCL7441	Unigene0038564	Unigene0029888	Unigene0037940	Unigene0002640	Unigene0030398	Unigene0014874	Unigene0032579	Unigene0022548	Unigene0015586	Unigene0039033
ORTHOMCL6940	Unigene0005030	Unigene0032441	Unigene0002423	Unigene0002183	Unigene0034961	Unigene0032788	Unigene0030945	Unigene0043604	Unigene0029350	Unigene0002171
ORTHOMCL4855	Unigene0011248	Unigene0009492	Unigene0042169	Unigene0004795	Unigene0039677	Unigene0020571	Unigene0039156	Unigene0043682	Unigene0000223	Unigene0012191
ORTHOMCL4980	Unigene0018933	Unigene0034084	Unigene0000305	Unigene0035075	Unigene0035494	Unigene0034330	Unigene0034034	Unigene0028838	Unigene0030428	Unigene0030809
ORTHOMCL8959	Unigene0031793	Unigene0021684	Unigene0004651	Unigene0041853	Unigene0025647	Unigene0006536	Unigene0024149	Unigene0040053	Unigene0035088	Unigene0006546
ORTHOMCL6779	Unigene0005899	Unigene0045314	Unigene0022549	Unigene0008530	Unigene0020155	Unigene0006088	Unigene0002041	Unigene0004350	Unigene0004624	Unigene0045389
ORTHOMCL9525	Unigene0037505	Unigene0027138	Unigene0030202	Unigene0028854	Unigene0036338	Unigene0006145	Unigene0037155	Unigene0020800	Unigene0014814	Unigene0029274
ORTHOMCL7604	Unigene0032637	Unigene0026485	Unigene0037401	Unigene0032822	Unigene0037956	Unigene0003249	Unigene0032151	Unigene0002790	Unigene0044738	Unigene0027136
ORTHOMCL7468	Unigene0019859	Unigene0002665	Unigene0014691	Unigene0003135	Unigene0009300	Unigene0013036	Unigene0003821	Unigene0010559	Unigene0004137	Unigene0003578
ORTHOMCL5718	Unigene0009176	Unigene0008268	Unigene0037660	Unigene0049182	Unigene0001217	Unigene0030673	Unigene0007735	Unigene0004458	Unigene0003041	Unigene0037785
ORTHOMCL7608	Unigene0041383	Unigene0044686	Unigene0002797	Unigene0047965	Unigene0034489	Unigene0043303	Unigene0029934	Unigene0041977	Unigene0036612	Unigene0045775
ORTHOMCL7434	Unigene0018099	Unigene0003893	Unigene0025233	Unigene0002630	Unigene0024322	Unigene0025538	Unigene0013625	Unigene0032653	Unigene0028770	Unigene0039640
ORTHOMCL6237	Unigene0041943	Unigene0038929	Unigene0033902	Unigene0031674	Unigene0001904	Unigene0042560	Unigene0001839	Unigene0034246	Unigene0001627	Unigene0037825
ORTHOMCL9197	Unigene0031325	Unigene0009491	Unigene0042171	Unigene0038184	Unigene0027259	Unigene0005154	Unigene0027032	Unigene0033985	Unigene0036453	Unigene0033611
ORTHOMCL6713	Unigene0001997	Unigene0046506	Unigene0038503	Unigene0015663	Unigene0004076	Unigene0013588	Unigene0038444	Unigene0005268	Unigene0014411	Unigene0004026
ORTHOMCL10368	Unigene0032282	Unigene0015804	Unigene0027511	Unigene0035103	Unigene0029140	Unigene0039784	Unigene0013694	Unigene0035365	Unigene0011050	Unigene0016322
ORTHOMCL5395	Unigene0011829	Unigene0028974	Unigene0037495	Unigene0045673	Unigene0035005	Unigene0000886	Unigene0028512	Unigene0029809	Unigene0011908	Unigene0000759
ORTHOMCL8044	Unigene0027712	Unigene0025047	Unigene0034182	Unigene0038064	Unigene0019786	Unigene0024626	Unigene0012486	Unigene0009935	Unigene0008725	Unigene0003267
ORTHOMCL8807	Unigene0033427	Unigene0027270	Unigene0025571	Unigene0031543	Unigene0009213	Unigene0044051	Unigene0033734	Unigene0022521	Unigene0041424	Unigene0004376
ORTHOMCL5439	Unigene0013786	Unigene0042444	Unigene0006334	Unigene0007303	Unigene0035252	Unigene0044962	Unigene0032359	Unigene0026411	Unigene0000810	Unigene0019618
ORTHOMCL7168	Unigene0013570	Unigene0017733	Unigene0004226	Unigene0027782	Unigene0002383	Unigene0040757	Unigene0036355	Unigene0048008	Unigene0002639	Unigene0023890
ORTHOMCL4713	Unigene0036432	Unigene0043892	Unigene0036007	Unigene0018236	Unigene0003999	Unigene0040565	Unigene0000144	Unigene0027604	Unigene0005104	Unigene0039235
ORTHOMCL10025	Unigene0032346	Unigene0037333	Unigene0028318	Unigene0018507	Unigene0026000	Unigene0008294	Unigene0024690	Unigene0016999	Unigene0035520	Unigene0038842
ORTHOMCL5020	Unigene0012682	Unigene0042985	Unigene0001453	Unigene0016855	Unigene0032586	Unigene0006102	Unigene0002897	Unigene0042472	Unigene0030373	Unigene0045014
ORTHOMCL7428	Unigene0040132	Unigene0003431	Unigene0037731	Unigene0044117	Unigene0032002	Unigene0041697	Unigene0005924	Unigene0044974	Unigene0008401	Unigene0042464
ORTHOMCL10453	Unigene0039533	Unigene0028641	Unigene0038808	Unigene0012014	Unigene0031931	Unigene0042176	Unigene0038396	Unigene0045184	Unigene0046024	Unigene0037451
ORTHOMCL5540	Unigene0022299	Unigene0028575	Unigene0019778	Unigene0001007	Unigene0027123	Unigene0004123	Unigene0028126	Unigene0020173	Unigene0027640	Unigene0038048
ORTHOMCL6002	Unigene0018485	Unigene0003725	Unigene0032878	Unigene0007864	Unigene0005344	Unigene0040101	Unigene0003225	Unigene0042335	Unigene0001449	Unigene0012207
ORTHOMCL10108	Unigene0043597	Unigene0041161	Unigene0036116	Unigene0008822	Unigene0040275	Unigene0017382	Unigene0037846	Unigene0020991	Unigene0047229	Unigene0045998
ORTHOMCL5297	Unigene0043666	Unigene0003853	Unigene0034254	Unigene0002996	Unigene0040952	Unigene0020266	Unigene0033589	Unigene0043124	Unigene0017024	Unigene0000587
ORTHOMCL10409	Unigene0036993	Unigene0020778	Unigene0011496	Unigene0033628	Unigene0036278	Unigene0018357	Unigene0031989	Unigene0040127	Unigene0029417	Unigene0037393
ORTHOMCL9853	Unigene0007436	Unigene0039896	Unigene0023182	Unigene0033065	Unigene0031895	Unigene0042013	Unigene0032666	Unigene0043759	Unigene0011963	Unigene0038577
ORTHOMCL5775	Unigene0017390	Unigene0042982	Unigene0033992	Unigene0001265	Unigene0013329	Unigene0042871	Unigene0037154	Unigene0042635	Unigene0043047	Unigene0044854
ORTHOMCL8054	Unigene0031557	Unigene0004238	Unigene0038817	Unigene0007609	Unigene0016644	Unigene0030416	Unigene0015349	Unigene0003283	Unigene0006919	Unigene0015118
ORTHOMCL5672	Unigene0001459	Unigene0038487	Unigene0018395	Unigene0040907	Unigene0014749	Unigene0001171	Unigene0029700	Unigene0039352	Unigene0021148	Unigene0040204
ORTHOMCL9875	Unigene0021753	Unigene0024850	Unigene0022211	Unigene0007531	Unigene0026588	Unigene0019654	Unigene0024994	Unigene0024342	Unigene0017702	Unigene0028355
ORTHOMCL6956	Unigene0002183	Unigene0015007	Unigene0023817	Unigene0035244	Unigene0029282	Unigene0025352	Unigene0023516	Unigene0004195	Unigene0047463	Unigene0002345
ORTHOMCL9453	Unigene0023192	Unigene0032874	Unigene0032232	Unigene0018401	Unigene0029245	Unigene0028072	Unigene0017075	Unigene0032547	Unigene0005874	Unigene0038772
ORTHOMCL5381	Unigene0035884	Unigene0043413	Unigene0040937	Unigene0022776	Unigene0037515	Unigene0000739	Unigene0039828	Unigene0006832	Unigene0045361	Unigene0002275
ORTHOMCL6936	Unigene0015306	Unigene0006597	Unigene0037035	Unigene0004998	Unigene0002210	Unigene0046253	Unigene0009501	Unigene0020028	Unigene0047977	Unigene0006151
ORTHOMCL7214	Unigene0036078	Unigene0039426	Unigene0002418	Unigene0048980	Unigene0038082	Unigene0041931	Unigene0009421	Unigene0044344	Unigene0043713	Unigene0040622
ORTHOMCL4719	Unigene0000634	Unigene0001180	Unigene0000791	Unigene0000147	Unigene0000609	Unigene0001248	Unigene0000684	Unigene0022250	Unigene0001111	Unigene0001117
ORTHOMCL9836	Unigene0028377	Unigene0042187	Unigene0033659	Unigene0045829	Unigene0010198	Unigene0011422	Unigene0007323	Unigene0023134	Unigene0042268	Unigene0011186
ORTHOMCL10746	Unigene0041967	Unigene0044767	Unigene0037938	Unigene0046635	Unigene0019542	Unigene0023112	Unigene0016417	Unigene0022882	Unigene0044859	Unigene0040721
ORTHOMCL4885	Unigene0001059	Unigene0026229	Unigene0021983	Unigene0026309	Unigene0031803	Unigene0000386	Unigene0029898	Unigene0000240	Unigene0000278	Unigene0000366
ORTHOMCL9575	Unigene0017395	Unigene0041546	Unigene0018876	Unigene0031054	Unigene0011517	Unigene0025772	Unigene0019042	Unigene0006326	Unigene0042242	Unigene0006655
ORTHOMCL5321	Unigene0034290	Unigene0040850	Unigene0000616	Unigene0047639	Unigene0017373	Unigene0003830	Unigene0009874	Unigene0040974	Unigene0047455	Unigene0029947
ORTHOMCL9747	Unigene0042247	Unigene0043464	Unigene0042689	Unigene0048313	Unigene0039260	Unigene0025044	Unigene0006942	Unigene0014209	Unigene0014731	Unigene0014806
ORTHOMCL10736	Unigene0031025	Unigene0029593	Unigene0040395	Unigene0034098	Unigene0016155	Unigene0047416	Unigene0030426	Unigene0041760	Unigene0032540	Unigene0040756
ORTHOMCL6412	Unigene0026413	Unigene0001757	Unigene0031069	Unigene0020817	Unigene0010173	Unigene0046772	Unigene0008483	Unigene0004656	Unigene0005018	Unigene0007376
ORTHOMCL10807	Unigene0039833	Unigene0037561	Unigene0038466	Unigene0034285	Unigene0040988	Unigene0041299	Unigene0038460	Unigene0018052	Unigene0041905	Unigene0044639
ORTHOMCL4850	Unigene0020629	Unigene0000241	Unigene0007955	Unigene0000317	Unigene0031238	Unigene0001738	Unigene0000221	Unigene0033746	Unigene0030086	Unigene0000358
ORTHOMCL9202	Unigene0040370	Unigene0036119	Unigene0025091	Unigene0018988	Unigene0005166	Unigene0011009	Unigene0034115	Unigene0026220	Unigene0043347	Unigene0005661
ORTHOMCL9771	Unigene0028034	Unigene0035775	Unigene0007531	Unigene0041430	Unigene0013579	Unigene0031549	Unigene0007074	Unigene0040862	Unigene0032580	Unigene0034397
ORTHOMCL5363	Unigene0023360	Unigene0040250	Unigene0024166	Unigene0026657	Unigene0013077	Unigene0029457	Unigene0027420	Unigene0034107	Unigene0046637	Unigene0000708
ORTHOMCL4616	Unigene0023797	Unigene0044995	Unigene0008221	Unigene0026261	Unigene0032314	Unigene0005852	Unigene0030075	Unigene0000096	Unigene0002928	Unigene0040301
ORTHOMCL5244	Unigene0004128	Unigene0014823	Unigene0019314	Unigene0044890	Unigene0009839	Unigene0005073	Unigene0039315	Unigene0004943	Unigene0000528	Unigene0038054
ORTHOMCL6204	Unigene0027329	Unigene0037003	Unigene0001602	Unigene0040500	Unigene0022712	Unigene0004737	Unigene0024303	Unigene0034902	Unigene0035200	Unigene0034017
ORTHOMCL10034	Unigene0030268	Unigene0022239	Unigene0015327	Unigene0008327	Unigene0028331	Unigene0016317	Unigene0022254	Unigene0037518	Unigene0032794	Unigene0035034
ORTHOMCL8008	Unigene0016896	Unigene0029336	Unigene0019946	Unigene0010192	Unigene0013451	Unigene0003227	Unigene0015904	Unigene0010768	Unigene0009967	Unigene0037810
ORTHOMCL4444	Unigene0037834	Unigene0000123	Unigene0033192	Unigene0001097	Unigene0022008	Unigene0037009	Unigene0000031	Unigene0046068	Unigene0018818	Unigene0000854
ORTHOMCL9690	Unigene0014828	Unigene0023978	Unigene0041738	Unigene0011676	Unigene0006724	Unigene0030529	Unigene0021595	Unigene0021079	Unigene0011345	Unigene0037614
ORTHOMCL5122	Unigene0000643	Unigene0008349	Unigene0025990	Unigene0029204	Unigene0021418	Unigene0000565	Unigene0000575	Unigene0000427	Unigene0030470	Unigene0000538
ORTHOMCL9374	Unigene0021696	Unigene0005649	Unigene0035031	Unigene0047170	Unigene0015695	Unigene0044533	Unigene0031180	Unigene0047570	Unigene0024258	Unigene0039131
ORTHOMCL8479	Unigene0018518	Unigene0012843	Unigene0023258	Unigene0012636	Unigene0021589	Unigene0019346	Unigene0015963	Unigene0012147	Unigene0021317	Unigene0020844
ORTHOMCL5275	Unigene0024289	Unigene0029541	Unigene0000559	Unigene0027210	Unigene0035518	Unigene0040923	Unigene0032336	Unigene0026344	Unigene0046367	Unigene0043427
ORTHOMCL10282	Unigene0043694	Unigene0041577	Unigene0035013	Unigene0023535	Unigene0015038	Unigene0026685	Unigene0015412	Unigene0024175	Unigene0019875	Unigene0010290
ORTHOMCL5835	Unigene0001328	Unigene0005162	Unigene0025223	Unigene0043088	Unigene0011575	Unigene0006105	Unigene0039780	Unigene0002648	Unigene0047751	Unigene0009189
ORTHOMCL4982	Unigene0025029	Unigene0040826	Unigene0022565	Unigene0044421	Unigene0014627	Unigene0017693	Unigene0029900	Unigene0000305	Unigene0026787	Unigene0005547
ORTHOMCL5057	Unigene0034965	Unigene0022784	Unigene0000525	Unigene0000392	Unigene0040405	Unigene0031136	Unigene0023268	Unigene0000365	Unigene0020170	Unigene0001581
ORTHOMCL7553	Unigene0010357	Unigene0019372	Unigene0027437	Unigene0002746	Unigene0037037	Unigene0026427	Unigene0029380	Unigene0015135	Unigene0011467	Unigene0008663
ORTHOMCL7384	Unigene0004606	Unigene0006578	Unigene0011936	Unigene0010019	Unigene0008268	Unigene0023049	Unigene0002581	Unigene0026354	Unigene0021364	Unigene0029905
ORTHOMCL10290	Unigene0010381	Unigene0017113	Unigene0036753	Unigene0014862	Unigene0036832	Unigene0017871	Unigene0020483	Unigene0033322	Unigene0046343	Unigene0038662
ORTHOMCL6164	Unigene0021268	Unigene0003140	Unigene0001567	Unigene0019173	Unigene0006143	Unigene0013450	Unigene0004064	Unigene0008163	Unigene0016588	Unigene0038878
ORTHOMCL7030	Unigene0004083	Unigene0004487	Unigene0002251	Unigene0046149	Unigene0007003	Unigene0034638	Unigene0035476	Unigene0041656	Unigene0046971	Unigene0018646
ORTHOMCL9110	Unigene0014757	Unigene0012945	Unigene0034905	Unigene0042914	Unigene0005124	Unigene0017320	Unigene0039601	Unigene0004972	Unigene0007306	Unigene0033756
ORTHOMCL6280	Unigene0017059	Unigene0001655	Unigene0021906	Unigene0049140	Unigene0003628	Unigene0040274	Unigene0040036	Unigene0001898	Unigene0010793	Unigene0011321
ORTHOMCL4643	Unigene0041917	Unigene0020408	Unigene0001894	Unigene0028469	Unigene0001369	Unigene0008131	Unigene0006378	Unigene0031364	Unigene0005549	Unigene0004745
ORTHOMCL8771	Unigene0040846	Unigene0015305	Unigene0020249	Unigene0023120	Unigene0026345	Unigene0015777	Unigene0036036	Unigene0024830	Unigene0015359	Unigene0004298
ORTHOMCL7579	Unigene0024322	Unigene0043079	Unigene0038693	Unigene0044347	Unigene0041088	Unigene0030208	Unigene0002764	Unigene0038158	Unigene0042566	Unigene0043647
ORTHOMCL8460	Unigene0035633	Unigene0029197	Unigene0003789	Unigene0029476	Unigene0036513	Unigene0045289	Unigene0022046	Unigene0029181	Unigene0021071	Unigene0043036
ORTHOMCL9812	Unigene0031596	Unigene0009375	Unigene0013731	Unigene0031018	Unigene0030429	Unigene0021047	Unigene0030317	Unigene0029983	Unigene0048394	Unigene0007247
ORTHOMCL8242	Unigene0016297	Unigene0007881	Unigene0036417	Unigene0008941	Unigene0034325	Unigene0003509	Unigene0035544	Unigene0007293	Unigene0031934	Unigene0017296
ORTHOMCL8438	Unigene0007653	Unigene0040721	Unigene0039740	Unigene0016341	Unigene0003763	Unigene0041908	Unigene0032827	Unigene0025867	Unigene0033740	Unigene0017764
ORTHOMCL10973	Unigene0037938	Unigene0039498	Unigene0040675	Unigene0031317	Unigene0036478	Unigene0035423	Unigene0032466	Unigene0025519	Unigene0042356	Unigene0042695
ORTHOMCL5629	Unigene0034046	Unigene0027861	Unigene0001131	Unigene0015340	Unigene0031717	Unigene0044503	Unigene0028525	Unigene0045202	Unigene0021384	Unigene0042039
ORTHOMCL9654	Unigene0032670	Unigene0042297	Unigene0012183	Unigene0024424	Unigene0033114	Unigene0040220	Unigene0023772	Unigene0006568	Unigene0025391	Unigene0038342
ORTHOMCL9268	Unigene0007673	Unigene0030870	Unigene0031450	Unigene0023209	Unigene0021010	Unigene0005337	Unigene0028811	Unigene0023155	Unigene0027515	Unigene0044240
ORTHOMCL10388	Unigene0018085	Unigene0017107	Unigene0035568	Unigene0049052	Unigene0011975	Unigene0011276	Unigene0014234	Unigene0020751	Unigene0045720	Unigene0043434
ORTHOMCL8176	Unigene0039023	Unigene0046801	Unigene0042194	Unigene0046616	Unigene0004783	Unigene0035016	Unigene0036233	Unigene0003419	Unigene0033288	Unigene0011970
ORTHOMCL7823	Unigene0031667	Unigene0044775	Unigene0041167	Unigene0042907	Unigene0035723	Unigene0041526	Unigene0033981	Unigene0003033	Unigene0025781	Unigene0031473
ORTHOMCL9249	Unigene0005271	Unigene0033041	Unigene0040250	Unigene0005782	Unigene0030087	Unigene0039375	Unigene0025968	Unigene0017331	Unigene0021772	Unigene0028715
ORTHOMCL6515	Unigene0042498	Unigene0040816	Unigene0018167	Unigene0012552	Unigene0005158	Unigene0040661	Unigene0028980	Unigene0042872	Unigene0001830	Unigene0034145
ORTHOMCL5310	Unigene0041310	Unigene0000600	Unigene0038954	Unigene0001777	Unigene0008614	Unigene0043042	Unigene0037163	Unigene0006251	Unigene0041045	Unigene0003752
ORTHOMCL8315	Unigene0005284	Unigene0023373	Unigene0011800	Unigene0019430	Unigene0037356	Unigene0021971	Unigene0022711	Unigene0021406	Unigene0022293	Unigene0003590
ORTHOMCL8308	Unigene0040350	Unigene0014014	Unigene0007116	Unigene0012202	Unigene0003581	Unigene0035043	Unigene0037392	Unigene0028548	Unigene0037312	Unigene0020357
ORTHOMCL5572	Unigene0037586	Unigene0041897	Unigene0036620	Unigene0031076	Unigene0001061	Unigene0045367	Unigene0021385	Unigene0014898	Unigene0048049	Unigene0040411
ORTHOMCL10917	Unigene0021894	Unigene0027304	Unigene0033667	Unigene0021838	Unigene0028669	Unigene0025223	Unigene0025242	Unigene0027323	Unigene0031589	Unigene0040781
ORTHOMCL6532	Unigene0002332	Unigene0041661	Unigene0003438	Unigene0001845	Unigene0040328	Unigene0019982	Unigene0005623	Unigene0046125	Unigene0003325	Unigene0006284
ORTHOMCL6946	Unigene0036064	Unigene0002176	Unigene0008673	Unigene0046930	Unigene0034779	Unigene0043305	Unigene0034370	Unigene0020839	Unigene0030794	Unigene0045449
ORTHOMCL8793	Unigene0004902	Unigene0011723	Unigene0017142	Unigene0015001	Unigene0005683	Unigene0029033	Unigene0016719	Unigene0014783	Unigene0010023	Unigene0007025
ORTHOMCL8278	Unigene0007962	Unigene0010473	Unigene0036234	Unigene0049556	Unigene0035998	Unigene0013947	Unigene0009149	Unigene0004130	Unigene0003540	Unigene0045401
ORTHOMCL10922	Unigene0037196	Unigene0022355	Unigene0037737	Unigene0027534	Unigene0032840	Unigene0029087	Unigene0036676	Unigene0040445	Unigene0043813	Unigene0043592
ORTHOMCL5896	Unigene0001382	Unigene0025120	Unigene0031066	Unigene0024939	Unigene0036678	Unigene0045363	Unigene0028114	Unigene0022978	Unigene0024790	Unigene0021266
ORTHOMCL6611	Unigene0001921	Unigene0025935	Unigene0024090	Unigene0019537	Unigene0011563	Unigene0037017	Unigene0011655	Unigene0017412	Unigene0015493	Unigene0012668
ORTHOMCL10404	Unigene0016531	Unigene0029277	Unigene0035361	Unigene0030487	Unigene0036761	Unigene0045914	Unigene0029778	Unigene0043737	Unigene0011470	Unigene0012369
ORTHOMCL5262	Unigene0021159	Unigene0027863	Unigene0033344	Unigene0029570	Unigene0036019	Unigene0000542	Unigene0033104	Unigene0029157	Unigene0024674	Unigene0045875
ORTHOMCL7926	Unigene0019786	Unigene0007507	Unigene0038835	Unigene0011277	Unigene0013573	Unigene0021625	Unigene0037532	Unigene0003129	Unigene0004719	Unigene0040591
ORTHOMCL5156	Unigene0003490	Unigene0027676	Unigene0004358	Unigene0010597	Unigene0035795	Unigene0044618	Unigene0005993	Unigene0044477	Unigene0028355	Unigene0001006
ORTHOMCL7165	Unigene0033762	Unigene0042562	Unigene0036318	Unigene0026264	Unigene0002380	Unigene0046026	Unigene0028996	Unigene0044445	Unigene0034354	Unigene0044878
ORTHOMCL4360	Unigene0000318	Unigene0000886	Unigene0018994	Unigene0000001	Unigene0000035	Unigene0022850	Unigene0012003	Unigene0000241	Unigene0000186	Unigene0000204
ORTHOMCL5161	Unigene0020707	Unigene0005506	Unigene0000453	Unigene0035188	Unigene0031456	Unigene0008233	Unigene0010389	Unigene0009008	Unigene0000947	Unigene0014918
ORTHOMCL10874	Unigene0033996	Unigene0028388	Unigene0037322	Unigene0047788	Unigene0019888	Unigene0046473	Unigene0030414	Unigene0041571	Unigene0041705	Unigene0031049
ORTHOMCL4540	Unigene0000226	Unigene0044828	Unigene0031884	Unigene0000253	Unigene0000067	Unigene0000466	Unigene0000179	Unigene0000384	Unigene0028232	Unigene0000277
ORTHOMCL10854	Unigene0028288	Unigene0042378	Unigene0023935	Unigene0033653	Unigene0019297	Unigene0025440	Unigene0029834	Unigene0026822	Unigene0041777	Unigene0026800
ORTHOMCL8079	Unigene0037462	Unigene0003549	Unigene0022063	Unigene0049251	Unigene0003317	Unigene0009108	Unigene0007260	Unigene0047361	Unigene0012258	Unigene0018180
ORTHOMCL8362	Unigene0022150	Unigene0007936	Unigene0038252	Unigene0005014	Unigene0004971	Unigene0041530	Unigene0005270	Unigene0009122	Unigene0004149	Unigene0015637
ORTHOMCL4679	Unigene0000513	Unigene0000174	Unigene0000657	Unigene0025758	Unigene0000797	Unigene0001314	Unigene0000306	Unigene0000126	Unigene0000208	Unigene0000623
ORTHOMCL8598	Unigene0026990	Unigene0040766	Unigene0033289	Unigene0020907	Unigene0031704	Unigene0031572	Unigene0003988	Unigene0018284	Unigene0009947	Unigene0023932
ORTHOMCL5376	Unigene0035960	Unigene0012226	Unigene0033632	Unigene0001132	Unigene0039529	Unigene0001140	Unigene0001031	Unigene0008430	Unigene0000731	Unigene0002970
ORTHOMCL8885	Unigene0041956	Unigene0041759	Unigene0026129	Unigene0025634	Unigene0040061	Unigene0040817	Unigene0014746	Unigene0041200	Unigene0004517	Unigene0042682
ORTHOMCL4971	Unigene0033502	Unigene0010437	Unigene0036404	Unigene0025359	Unigene0033879	Unigene0003016	Unigene0035949	Unigene0015713	Unigene0041391	Unigene0000301
ORTHOMCL9511	Unigene0022186	Unigene0029603	Unigene0015522	Unigene0045092	Unigene0019139	Unigene0045539	Unigene0032515	Unigene0033021	Unigene0022594	Unigene0039541
ORTHOMCL5733	Unigene0003024	Unigene0002595	Unigene0037944	Unigene0001227	Unigene0034655	Unigene0024221	Unigene0003087	Unigene0039500	Unigene0045670	Unigene0021288
ORTHOMCL7454	Unigene0002651	Unigene0009487	Unigene0019662	Unigene0008018	Unigene0037267	Unigene0041817	Unigene0005273	Unigene0041455	Unigene0031332	Unigene0008656
ORTHOMCL7634	Unigene0024562	Unigene0044360	Unigene0002823	Unigene0021860	Unigene0015220	Unigene0005775	Unigene0016349	Unigene0046438	Unigene0019844	Unigene0004076
ORTHOMCL10891	Unigene0022529	Unigene0023432	Unigene0034566	Unigene0031567	Unigene0028702	Unigene0046846	Unigene0030893	Unigene0039718	Unigene0020592	Unigene0043907
ORTHOMCL5970	Unigene0037405	Unigene0018318	Unigene0036501	Unigene0001426	Unigene0038972	Unigene0042612	Unigene0037289	Unigene0039501	Unigene0041956	Unigene0036868
ORTHOMCL8069	Unigene0003946	Unigene0014166	Unigene0013643	Unigene0044815	Unigene0003299	Unigene0045996	Unigene0031567	Unigene0037603	Unigene0032012	Unigene0005463
ORTHOMCL4463	Unigene0000040	Unigene0000147	Unigene0032279	Unigene0023416	Unigene0014672	Unigene0009927	Unigene0000983	Unigene0000056	Unigene0000143	Unigene0037386
ORTHOMCL5595	Unigene0033795	Unigene0027034	Unigene0005990	Unigene0020156	Unigene0013656	Unigene0025515	Unigene0001095	Unigene0030665	Unigene0029315	Unigene0045387
ORTHOMCL7252	Unigene0002451	Unigene0027521	Unigene0025644	Unigene0012724	Unigene0026019	Unigene0018273	Unigene0015655	Unigene0035307	Unigene0008892	Unigene0010691
ORTHOMCL10658	Unigene0018787	Unigene0028003	Unigene0019506	Unigene0039042	Unigene0014744	Unigene0026972	Unigene0028925	Unigene0032260	Unigene0028663	Unigene0036385
ORTHOMCL6668	Unigene0037640	Unigene0036745	Unigene0040144	Unigene0027802	Unigene0031772	Unigene0040471	Unigene0030693	Unigene0020092	Unigene0001961	Unigene0044051
ORTHOMCL5780	Unigene0005317	Unigene0015410	Unigene0037958	Unigene0038906	Unigene0033201	Unigene0030545	Unigene0007459	Unigene0015386	Unigene0001267	Unigene0026548
ORTHOMCL6333	Unigene0023093	Unigene0029456	Unigene0028199	Unigene0044302	Unigene0037099	Unigene0012005	Unigene0032373	Unigene0041245	Unigene0021589	Unigene0043749
ORTHOMCL10956	Unigene0034335	Unigene0029073	Unigene0027676	Unigene0027659	Unigene0024469	Unigene0034122	Unigene0030139	Unigene0028706	Unigene0046279	Unigene0031631
ORTHOMCL7841	Unigene0005180	Unigene0040936	Unigene0042481	Unigene0009843	Unigene0004165	Unigene0003043	Unigene0029670	Unigene0004312	Unigene0041682	Unigene0037054
ORTHOMCL10929	Unigene0023691	Unigene0027910	Unigene0033725	Unigene0025137	Unigene0030279	Unigene0043036	Unigene0029748	Unigene0045370	Unigene0025564	Unigene0041152
ORTHOMCL4707	Unigene0000540	Unigene0000213	Unigene0000140	Unigene0000437	Unigene0026857	Unigene0000554	Unigene0038473	Unigene0028187	Unigene0021018	Unigene0031373
ORTHOMCL9657	Unigene0038915	Unigene0041103	Unigene0025738	Unigene0046888	Unigene0017202	Unigene0026280	Unigene0028943	Unigene0021359	Unigene0018287	Unigene0030865
ORTHOMCL9377	Unigene0015305	Unigene0044711	Unigene0023113	Unigene0026471	Unigene0009290	Unigene0040574	Unigene0012400	Unigene0041499	Unigene0022278	Unigene0005656
ORTHOMCL5466	Unigene0004918	Unigene0032816	Unigene0037795	Unigene0015123	Unigene0000874	Unigene0026414	Unigene0033747	Unigene0041998	Unigene0009124	Unigene0002049
ORTHOMCL7996	Unigene0036293	Unigene0003214	Unigene0042751	Unigene0049299	Unigene0033074	Unigene0044389	Unigene0008316	Unigene0024140	Unigene0045422	Unigene0008099
ORTHOMCL5031	Unigene0039503	Unigene0041023	Unigene0029528	Unigene0048078	Unigene0002238	Unigene0001561	Unigene0030698	Unigene0006638	Unigene0037018	Unigene0013879
ORTHOMCL10594	Unigene0035596	Unigene0039711	Unigene0040302	Unigene0044293	Unigene0023548	Unigene0013769	Unigene0038491	Unigene0044652	Unigene0044886	Unigene0044090
ORTHOMCL5304	Unigene0034244	Unigene0011536	Unigene0033008	Unigene0023246	Unigene0016014	Unigene0000594	Unigene0033977	Unigene0022270	Unigene0020681	Unigene0006564
ORTHOMCL4970	Unigene0025449	Unigene0008417	Unigene0040773	Unigene0000301	Unigene0000901	Unigene0000504	Unigene0002292	Unigene0001126	Unigene0005051	Unigene0030653
ORTHOMCL6347	Unigene0011978	Unigene0046260	Unigene0001708	Unigene0025261	Unigene0018476	Unigene0047339	Unigene0031039	Unigene0020478	Unigene0019825	Unigene0031805
ORTHOMCL10046	Unigene0023112	Unigene0023014	Unigene0019109	Unigene0008382	Unigene0017550	Unigene0017859	Unigene0011453	Unigene0040873	Unigene0039972	Unigene0008912
ORTHOMCL7483	Unigene0037569	Unigene0041090	Unigene0027716	Unigene0023161	Unigene0014609	Unigene0042795	Unigene0030127	Unigene0033655	Unigene0040446	Unigene0018598
ORTHOMCL8817	Unigene0037799	Unigene0046809	Unigene0017161	Unigene0027887	Unigene0034110	Unigene0021277	Unigene0039280	Unigene0031812	Unigene0040269	Unigene0009813
ORTHOMCL10593	Unigene0030350	Unigene0025932	Unigene0027314	Unigene0037018	Unigene0025446	Unigene0046848	Unigene0025154	Unigene0013735	Unigene0045758	Unigene0033831
ORTHOMCL7145	Unigene0037313	Unigene0028145	Unigene0034480	Unigene0026246	Unigene0025393	Unigene0002361	Unigene0009339	Unigene0019317	Unigene0042078	Unigene0006400
ORTHOMCL9204	Unigene0028154	Unigene0025460	Unigene0039858	Unigene0023682	Unigene0017034	Unigene0026145	Unigene0012198	Unigene0016000	Unigene0022412	Unigene0039683
ORTHOMCL7080	Unigene0014345	Unigene0027766	Unigene0004703	Unigene0002286	Unigene0035880	Unigene0030994	Unigene0016187	Unigene0046566	Unigene0012279	Unigene0010124
ORTHOMCL10333	Unigene0038087	Unigene0010740	Unigene0032327	Unigene0032794	Unigene0019378	Unigene0019377	Unigene0017220	Unigene0025601	Unigene0027213	Unigene0020969
ORTHOMCL10295	Unigene0017268	Unigene0020764	Unigene0035381	Unigene0010412	Unigene0040998	Unigene0017881	Unigene0018016	Unigene0017651	Unigene0022096	Unigene0018925
ORTHOMCL6051	Unigene0001488	Unigene0035445	Unigene0026505	Unigene0035232	Unigene0025965	Unigene0030606	Unigene0009400	Unigene0033793	Unigene0045706	Unigene0032746
ORTHOMCL5494	Unigene0009515	Unigene0012322	Unigene0008781	Unigene0008982	Unigene0034929	Unigene0000961	Unigene0023152	Unigene0044758	Unigene0042233	Unigene0041140
ORTHOMCL4810	Unigene0000201	Unigene0006015	Unigene0034052	Unigene0044122	Unigene0033034	Unigene0016006	Unigene0018390	Unigene0046567	Unigene0008949	Unigene0036474
ORTHOMCL9513	Unigene0032724	Unigene0028883	Unigene0036560	Unigene0027611	Unigene0033001	Unigene0043280	Unigene0031367	Unigene0028403	Unigene0012782	Unigene0006105
ORTHOMCL4407	Unigene0007623	Unigene0032787	Unigene0039741	Unigene0004232	Unigene0006371	Unigene0000017	Unigene0010772	Unigene0045162	Unigene0002212	Unigene0006705
ORTHOMCL6606	Unigene0026550	Unigene0002915	Unigene0002858	Unigene0026769	Unigene0037735	Unigene0043537	Unigene0002981	Unigene0045071	Unigene0041725	Unigene0001918
ORTHOMCL4424	Unigene0003076	Unigene0040696	Unigene0010193	Unigene0048673	Unigene0000023	Unigene0007019	Unigene0000984	Unigene0000320	Unigene0000895	Unigene0044342
ORTHOMCL9703	Unigene0016963	Unigene0016653	Unigene0015448	Unigene0036503	Unigene0026996	Unigene0006760	Unigene0012399	Unigene0009931	Unigene0034578	Unigene0035580
ORTHOMCL8854	Unigene0017107	Unigene0020258	Unigene0038067	Unigene0009912	Unigene0004468	Unigene0042361	Unigene0024242	Unigene0037548	Unigene0015763	Unigene0007195
ORTHOMCL10346	Unigene0019681	Unigene0012872	Unigene0010858	Unigene0035087	Unigene0026028	Unigene0036207	Unigene0023318	Unigene0033854	Unigene0032210	Unigene0029743
ORTHOMCL4392	Unigene0000011	Unigene0043165	Unigene0032857	Unigene0045537	Unigene0032096	Unigene0001128	Unigene0033251	Unigene0000973	Unigene0045409	Unigene0001368
ORTHOMCL4858	Unigene0006549	Unigene0028881	Unigene0024386	Unigene0022554	Unigene0035928	Unigene0017593	Unigene0032906	Unigene0037792	Unigene0030860	Unigene0005703
ORTHOMCL9893	Unigene0026619	Unigene0027481	Unigene0007601	Unigene0044150	Unigene0032265	Unigene0047692	Unigene0036264	Unigene0041278	Unigene0038853	Unigene0045734
ORTHOMCL8058	Unigene0018741	Unigene0025554	Unigene0041559	Unigene0008537	Unigene0025170	Unigene0036308	Unigene0004132	Unigene0003287	Unigene0009707	Unigene0012056
ORTHOMCL8583	Unigene0032413	Unigene0013731	Unigene0020019	Unigene0045095	Unigene0021625	Unigene0031793	Unigene0018753	Unigene0028535	Unigene0026077	Unigene0031855
ORTHOMCL4869	Unigene0036881	Unigene0019932	Unigene0041093	Unigene0001818	Unigene0001317	Unigene0028702	Unigene0001770	Unigene0013107	Unigene0021041	Unigene0003557
ORTHOMCL5120	Unigene0011129	Unigene0023947	Unigene0033081	Unigene0028321	Unigene0030946	Unigene0010360	Unigene0003094	Unigene0043708	Unigene0047108	Unigene0039444
ORTHOMCL10105	Unigene0036593	Unigene0023108	Unigene0008796	Unigene0041034	Unigene0031564	Unigene0034409	Unigene0027159	Unigene0041111	Unigene0034641	Unigene0046022
ORTHOMCL8433	Unigene0005788	Unigene0003751	Unigene0042451	Unigene0049385	Unigene0039643	Unigene0042466	Unigene0036771	Unigene0047917	Unigene0016656	Unigene0041529
ORTHOMCL6614	Unigene0016904	Unigene0016533	Unigene0015015	Unigene0027591	Unigene0001922	Unigene0047346	Unigene0034243	Unigene0006148	Unigene0010889	Unigene0040673
ORTHOMCL7362	Unigene0039955	Unigene0020974	Unigene0030368	Unigene0045586	Unigene0011488	Unigene0044988	Unigene0039049	Unigene0017676	Unigene0021767	Unigene0002559
ORTHOMCL10731	Unigene0034613	Unigene0040680	Unigene0033267	Unigene0045582	Unigene0036498	Unigene0047276	Unigene0016094	Unigene0028317	Unigene0045053	Unigene0039870
ORTHOMCL6065	Unigene0008450	Unigene0020367	Unigene0038143	Unigene0021193	Unigene0032477	Unigene0001497	Unigene0011171	Unigene0003240	Unigene0010221	Unigene0041228
ORTHOMCL4366	Unigene0004728	Unigene0003469	Unigene0000003	Unigene0041480	Unigene0020015	Unigene0044553	Unigene0036581	Unigene0004337	Unigene0046729	Unigene0004067
ORTHOMCL8653	Unigene0004075	Unigene0038300	Unigene0034474	Unigene0047896	Unigene0036425	Unigene0006659	Unigene0006469	Unigene0043229	Unigene0006609	Unigene0043558
ORTHOMCL8107	Unigene0039458	Unigene0037017	Unigene0010629	Unigene0035557	Unigene0034998	Unigene0043502	Unigene0035097	Unigene0042130	Unigene0046929	Unigene0031198
ORTHOMCL5584	Unigene0033966	Unigene0039720	Unigene0041319	Unigene0001077	Unigene0010623	Unigene0041603	Unigene0029571	Unigene0031426	Unigene0047978	Unigene0039952
ORTHOMCL10819	Unigene0035117	Unigene0034548	Unigene0018242	Unigene0044461	Unigene0031489	Unigene0046413	Unigene0033002	Unigene0041437	Unigene0046328	Unigene0039395
ORTHOMCL9734	Unigene0007019	Unigene0040734	Unigene0038538	Unigene0009550	Unigene0035184	Unigene0013954	Unigene0018837	Unigene0039445	Unigene0041207	Unigene0038602
ORTHOMCL10337	Unigene0020795	Unigene0020296	Unigene0019622	Unigene0010759	Unigene0019558	Unigene0047800	Unigene0018581	Unigene0044557	Unigene0012311	Unigene0044042
ORTHOMCL9560	Unigene0006284	Unigene0034832	Unigene0024405	Unigene0026126	Unigene0011486	Unigene0035400	Unigene0037315	Unigene0041742	Unigene0027230	Unigene0043997
ORTHOMCL10980	Unigene0040920	Unigene0042358	Unigene0035959	Unigene0039922	Unigene0034432	Unigene0029698	Unigene0030249	Unigene0042924	Unigene0026273	Unigene0041968
ORTHOMCL7173	Unigene0007089	Unigene0022934	Unigene0008603	Unigene0017637	Unigene0038138	Unigene0002387	Unigene0018141	Unigene0028441	Unigene0005372	Unigene0005376
ORTHOMCL9724	Unigene0006843	Unigene0016192	Unigene0035243	Unigene0027799	Unigene0034232	Unigene0034933	Unigene0039079	Unigene0024591	Unigene0025061	Unigene0007518
ORTHOMCL7278	Unigene0041122	Unigene0025539	Unigene0035133	Unigene0019547	Unigene0007748	Unigene0044594	Unigene0017871	Unigene0027029	Unigene0035478	Unigene0020922
ORTHOMCL5794	Unigene0042566	Unigene0046463	Unigene0037755	Unigene0011273	Unigene0040319	Unigene0032366	Unigene0018743	Unigene0001922	Unigene0010404	Unigene0039564
ORTHOMCL10260	Unigene0037943	Unigene0041418	Unigene0010134	Unigene0023119	Unigene0031619	Unigene0017296	Unigene0029199	Unigene0038125	Unigene0031262	Unigene0042938
ORTHOMCL5314	Unigene0003198	Unigene0000835	Unigene0035928	Unigene0032524	Unigene0035234	Unigene0000605	Unigene0008176	Unigene0026611	Unigene0046355	Unigene0025758
ORTHOMCL9673	Unigene0006659	Unigene0026429	Unigene0026399	Unigene0020838	Unigene0015076	Unigene0046829	Unigene0026846	Unigene0026374	Unigene0036711	Unigene0013007
ORTHOMCL4966	Unigene0025712	Unigene0014621	Unigene0034574	Unigene0031581	Unigene0009209	Unigene0013283	Unigene0027169	Unigene0000299	Unigene0045235	Unigene0025431
ORTHOMCL10906	Unigene0027000	Unigene0045962	Unigene0032667	Unigene0035034	Unigene0035293	Unigene0044239	Unigene0038954	Unigene0026212	Unigene0042395	Unigene0036996
ORTHOMCL6389	Unigene0033421	Unigene0007265	Unigene0035156	Unigene0001742	Unigene0026106	Unigene0004415	Unigene0036911	Unigene0004718	Unigene0040137	Unigene0012078
ORTHOMCL6863	Unigene0014879	Unigene0025376	Unigene0011445	Unigene0025077	Unigene0018654	Unigene0033844	Unigene0031525	Unigene0026600	Unigene0027267	Unigene0042415
ORTHOMCL9054	Unigene0038634	Unigene0044601	Unigene0006164	Unigene0044173	Unigene0034042	Unigene0004848	Unigene0030281	Unigene0042586	Unigene0041947	Unigene0044004
ORTHOMCL9798	Unigene0041346	Unigene0013800	Unigene0033412	Unigene0015645	Unigene0007166	Unigene0043026	Unigene0030132	Unigene0029812	Unigene0008375	Unigene0018365
ORTHOMCL9669	Unigene0022327	Unigene0027543	Unigene0037291	Unigene0024102	Unigene0016252	Unigene0016568	Unigene0006637	Unigene0032556	Unigene0041567	Unigene0010383
ORTHOMCL7798	Unigene0042063	Unigene0023214	Unigene0003641	Unigene0012174	Unigene0007045	Unigene0047302	Unigene0038639	Unigene0024734	Unigene0048082	Unigene0007317
ORTHOMCL6404	Unigene0036910	Unigene0046965	Unigene0035613	Unigene0043878	Unigene0035519	Unigene0042047	Unigene0038750	Unigene0001753	Unigene0002641	Unigene0042794
ORTHOMCL5350	Unigene0036707	Unigene0024985	Unigene0034596	Unigene0032961	Unigene0039741	Unigene0000686	Unigene0031060	Unigene0016845	Unigene0020435	Unigene0016359
ORTHOMCL9130	Unigene0015126	Unigene0020878	Unigene0026138	Unigene0032040	Unigene0038507	Unigene0022442	Unigene0032045	Unigene0007233	Unigene0029333	Unigene0031135
ORTHOMCL4792	Unigene0042613	Unigene0042453	Unigene0038705	Unigene0044662	Unigene0035029	Unigene0040889	Unigene0034700	Unigene0044342	Unigene0045376	Unigene0041609
ORTHOMCL7832	Unigene0003038	Unigene0015672	Unigene0011251	Unigene0031562	Unigene0033522	Unigene0005524	Unigene0032002	Unigene0030127	Unigene0045907	Unigene0044448
ORTHOMCL7068	Unigene0006286	Unigene0005081	Unigene0041286	Unigene0004965	Unigene0007773	Unigene0019013	Unigene0008020	Unigene0010267	Unigene0002279	Unigene0008281
ORTHOMCL5274	Unigene0040674	Unigene0041919	Unigene0034976	Unigene0049281	Unigene0012717	Unigene0043490	Unigene0034197	Unigene0043483	Unigene0042784	Unigene0000557
ORTHOMCL8556	Unigene0003932	Unigene0043499	Unigene0015290	Unigene0007552	Unigene0015403	Unigene0041979	Unigene0033555	Unigene0031734	Unigene0042815	Unigene0022793
ORTHOMCL4389	Unigene0000083	Unigene0000382	Unigene0000495	Unigene0000055	Unigene0000010	Unigene0000812	Unigene0000230	Unigene0042316	Unigene0000918	Unigene0000558
ORTHOMCL9307	Unigene0029953	Unigene0026878	Unigene0033499	Unigene0022830	Unigene0036918	Unigene0005433	Unigene0016255	Unigene0047825	Unigene0023344	Unigene0005571
ORTHOMCL10835	Unigene0041819	Unigene0042795	Unigene0037628	Unigene0040559	Unigene0034211	Unigene0018666	Unigene0030499	Unigene0030169	Unigene0031752	Unigene0040231
ORTHOMCL10047	Unigene0018266	Unigene0033446	Unigene0042851	Unigene0044964	Unigene0039709	Unigene0042355	Unigene0033422	Unigene0041766	Unigene0009592	Unigene0008393
ORTHOMCL9294	Unigene0005392	Unigene0036880	Unigene0018650	Unigene0015283	Unigene0012236	Unigene0015154	Unigene0022932	Unigene0017410	Unigene0043028	Unigene0039162
ORTHOMCL4624	Unigene0036519	Unigene0042094	Unigene0000100	Unigene0045383	Unigene0007528	Unigene0042916	Unigene0029942	Unigene0042142	Unigene0005762	Unigene0030217
ORTHOMCL9946	Unigene0038275	Unigene0040447	Unigene0013368	Unigene0014802	Unigene0021932	Unigene0025256	Unigene0010157	Unigene0044167	Unigene0019118	Unigene0007898
ORTHOMCL8802	Unigene0041923	Unigene0029341	Unigene0033262	Unigene0013294	Unigene0040762	Unigene0040606	Unigene0004697	Unigene0025796	Unigene0005744	Unigene0004367
ORTHOMCL8032	Unigene0038549	Unigene0005651	Unigene0019533	Unigene0047167	Unigene0021820	Unigene0042771	Unigene0007764	Unigene0046509	Unigene0003260	Unigene0042059
ORTHOMCL4918	Unigene0006158	Unigene0011794	Unigene0018216	Unigene0016008	Unigene0019092	Unigene0000260	Unigene0014933	Unigene0002821	Unigene0016440	Unigene0045896
ORTHOMCL8173	Unigene0003417	Unigene0022892	Unigene0030755	Unigene0044160	Unigene0039870	Unigene0023270	Unigene0039670	Unigene0024349	Unigene0026222	Unigene0039634
ORTHOMCL5191	Unigene0011605	Unigene0029687	Unigene0032303	Unigene0044384	Unigene0034970	Unigene0000481	Unigene0037591	Unigene0001398	Unigene0026303	Unigene0038254
ORTHOMCL4712	Unigene0002079	Unigene0031191	Unigene0012414	Unigene0027038	Unigene0016009	Unigene0042251	Unigene0019421	Unigene0027706	Unigene0013661	Unigene0031199
ORTHOMCL9317	Unigene0005506	Unigene0016029	Unigene0041472	Unigene0047986	Unigene0034450	Unigene0021069	Unigene0038144	Unigene0018473	Unigene0033852	Unigene0031257
ORTHOMCL7921	Unigene0009869	Unigene0044658	Unigene0003546	Unigene0016880	Unigene0003125	Unigene0018993	Unigene0003414	Unigene0014494	Unigene0016515	Unigene0017952
ORTHOMCL8057	Unigene0003287	Unigene0044636	Unigene0009524	Unigene0031244	Unigene0040642	Unigene0043252	Unigene0009389	Unigene0044959	Unigene0019999	Unigene0008293
ORTHOMCL6174	Unigene0037849	Unigene0025607	Unigene0036639	Unigene0001577	Unigene0003132	Unigene0046418	Unigene0003810	Unigene0041341	Unigene0008318	Unigene0038735
ORTHOMCL9721	Unigene0017685	Unigene0043440	Unigene0009914	Unigene0015818	Unigene0013388	Unigene0035264	Unigene0013479	Unigene0027290	Unigene0034953	Unigene0006835
ORTHOMCL9552	Unigene0021769	Unigene0029180	Unigene0016118	Unigene0041080	Unigene0022942	Unigene0031334	Unigene0028152	Unigene0023874	Unigene0006247	Unigene0040307
ORTHOMCL6706	Unigene0006986	Unigene0044849	Unigene0004856	Unigene0007077	Unigene0002104	Unigene0001989	Unigene0017011	Unigene0031052	Unigene0047513	Unigene0040820
ORTHOMCL10159	Unigene0034662	Unigene0046798	Unigene0041378	Unigene0029503	Unigene0021869	Unigene0028423	Unigene0009268	Unigene0042763	Unigene0029339	Unigene0037924
ORTHOMCL6093	Unigene0011614	Unigene0042346	Unigene0014439	Unigene0010333	Unigene0003825	Unigene0020081	Unigene0001515	Unigene0002782	Unigene0018995	Unigene0026975
ORTHOMCL5482	Unigene0041397	Unigene0044568	Unigene0012339	Unigene0017801	Unigene0036910	Unigene0000893	Unigene0002365	Unigene0016026	Unigene0024299	Unigene0022173
ORTHOMCL9439	Unigene0017476	Unigene0033748	Unigene0036070	Unigene0013189	Unigene0013291	Unigene0007330	Unigene0037906	Unigene0033310	Unigene0032490	Unigene0005828
ORTHOMCL4933	Unigene0038825	Unigene0040684	Unigene0000270	Unigene0039297	Unigene0032451	Unigene0035126	Unigene0032080	Unigene0038715	Unigene0045553	Unigene0037056
ORTHOMCL10896	Unigene0030425	Unigene0031704	Unigene0026583	Unigene0028058	Unigene0027118	Unigene0035380	Unigene0029008	Unigene0020702	Unigene0029768	Unigene0022212
ORTHOMCL6854	Unigene0035309	Unigene0043076	Unigene0039636	Unigene0018454	Unigene0032162	Unigene0003308	Unigene0037518	Unigene0002657	Unigene0026800	Unigene0020563
ORTHOMCL4883	Unigene0000623	Unigene0044901	Unigene0033855	Unigene0041883	Unigene0031569	Unigene0001181	Unigene0030258	Unigene0000239	Unigene0008437	Unigene0024527
ORTHOMCL4619	Unigene0011512	Unigene0023163	Unigene0000098	Unigene0015839	Unigene0031013	Unigene0001486	Unigene0018668	Unigene0000195	Unigene0017003	Unigene0025060
ORTHOMCL10398	Unigene0020939	Unigene0046811	Unigene0018129	Unigene0022557	Unigene0011389	Unigene0033488	Unigene0038419	Unigene0013779	Unigene0041504	Unigene0029231
ORTHOMCL10898	Unigene0028122	Unigene0032588	Unigene0021976	Unigene0035602	Unigene0020907	Unigene0044387	Unigene0023860	Unigene0045279	Unigene0030965	Unigene0044028
ORTHOMCL7621	Unigene0041076	Unigene0004616	Unigene0007463	Unigene0030607	Unigene0002807	Unigene0006405	Unigene0008868	Unigene0043605	Unigene0045857	Unigene0014120
ORTHOMCL7753	Unigene0035363	Unigene0005155	Unigene0035198	Unigene0005200	Unigene0002967	Unigene0004913	Unigene0039257	Unigene0027737	Unigene0047467	Unigene0033146
ORTHOMCL6555	Unigene0001864	Unigene0041149	Unigene0038712	Unigene0006360	Unigene0009322	Unigene0002124	Unigene0015312	Unigene0046385	Unigene0045946	Unigene0006327
ORTHOMCL4515	Unigene0018575	Unigene0028743	Unigene0004486	Unigene0025397	Unigene0000399	Unigene0047673	Unigene0037886	Unigene0003755	Unigene0000056	Unigene0000546
ORTHOMCL9537	Unigene0020536	Unigene0038831	Unigene0039322	Unigene0047002	Unigene0033033	Unigene0038094	Unigene0034795	Unigene0027115	Unigene0041367	Unigene0030260
ORTHOMCL10185	Unigene0015530	Unigene0042003	Unigene0036582	Unigene0029542	Unigene0038066	Unigene0009499	Unigene0039592	Unigene0033764	Unigene0044415	Unigene0045823
ORTHOMCL10517	Unigene0012709	Unigene0030066	Unigene0032412	Unigene0028492	Unigene0027759	Unigene0041188	Unigene0019551	Unigene0025312	Unigene0025589	Unigene0041229
ORTHOMCL8466	Unigene0038907	Unigene0043818	Unigene0032198	Unigene0003897	Unigene0040944	Unigene0003795	Unigene0038161	Unigene0041168	Unigene0011455	Unigene0041422
ORTHOMCL9901	Unigene0013377	Unigene0007631	Unigene0034838	Unigene0035680	Unigene0026359	Unigene0039730	Unigene0037504	Unigene0039749	Unigene0040465	Unigene0033744
ORTHOMCL5848	Unigene0039838	Unigene0012647	Unigene0022259	Unigene0005924	Unigene0020490	Unigene0042126	Unigene0030113	Unigene0001341	Unigene0021446	Unigene0041908
ORTHOMCL6937	Unigene0022967	Unigene0029547	Unigene0002170	Unigene0044935	Unigene0026901	Unigene0022800	Unigene0005697	Unigene0028744	Unigene0047518	Unigene0008483
ORTHOMCL9061	Unigene0028022	Unigene0004869	Unigene0036158	Unigene0045627	Unigene0035382	Unigene0029084	Unigene0019364	Unigene0037652	Unigene0022671	Unigene0036999
ORTHOMCL10212	Unigene0032200	Unigene0039817	Unigene0039449	Unigene0036528	Unigene0030100	Unigene0023131	Unigene0009728	Unigene0033997	Unigene0041833	Unigene0044349
ORTHOMCL6302	Unigene0036337	Unigene0043836	Unigene0034335	Unigene0003816	Unigene0002083	Unigene0003448	Unigene0016153	Unigene0041953	Unigene0028238	Unigene0004199
ORTHOMCL6312	Unigene0001855	Unigene0025829	Unigene0041721	Unigene0021614	Unigene0015717	Unigene0026180	Unigene0019373	Unigene0001680	Unigene0043233	Unigene0042655
ORTHOMCL8439	Unigene0035062	Unigene0024290	Unigene0003799	Unigene0027460	Unigene0003764	Unigene0034380	Unigene0029428	Unigene0013201	Unigene0018206	Unigene0043010
ORTHOMCL5661	Unigene0025156	Unigene0001157	Unigene0034486	Unigene0037600	Unigene0038717	Unigene0045550	Unigene0029731	Unigene0042412	Unigene0034198	Unigene0044666
ORTHOMCL4796	Unigene0020919	Unigene0041488	Unigene0035260	Unigene0029668	Unigene0035360	Unigene0046385	Unigene0020678	Unigene0046223	Unigene0000191	Unigene0025799
ORTHOMCL5505	Unigene0025409	Unigene0044842	Unigene0000942	Unigene0026301	Unigene0028647	Unigene0044415	Unigene0037951	Unigene0043364	Unigene0041993	Unigene0044428
ORTHOMCL6564	Unigene0001871	Unigene0003157	Unigene0028385	Unigene0048509	Unigene0036336	Unigene0044777	Unigene0029699	Unigene0042779	Unigene0027785	Unigene0036685
