# Supplementary material for: Comparative transcriptome provides strategy for phylogenetic analysis and SSR marker development in Chaenomeles
Source: Research Square preprint supplement (doi:10.21203/rs.3.rs-393262/v1), 2021-04-12
Supplement: Supplementary file 14 [file 79d0c79e631d83d9670567a4.xlsx]

## Sheet: Supplementary Table S9
Expression level of involved genes in biosynthesis of secondary metabolisms pathway
Othology	Gene symbol	GP (RPKM)	MY (RPKM)	MYXZ (RPKM)	RB (RPKM)	XZ (RPKM)	XZSS (RPKM)	ZPCA (RPKM)	ZPLP (RPKM)	ZPLY (RPKM)	ZPXC (RPKM)
ORTHOMCL5156	NPC6	169.43	33.41	1	38.8	18.9	36.48	20.58	20.99	51.32	35.55
ORTHOMCL5156	NPC6	169.43	33.41	1	38.8	18.9	36.48	20.58	20.99	51.32	35.55
ORTHOMCL10048	CDS2	22.97	15.37	13.1	19.09	19.25	13.96	12.71	14.15	19.7	15.03
ORTHOMCL8173	PGMP	24.66	50.9	55.71	48.65	31.84	69.19	75.11	98.35	88.92	65.58
ORTHOMCL7214	purH	22.31	43.07	42.82	29.78	34.71	43.01	53.28	38.58	29.7	43.34
ORTHOMCL5376	TKT2	65.52	37.78	33.91	27.05	15.71	38.62	25.58	20.58	36.06	20.26
ORTHOMCL5376	TKT2	65.52	37.78	33.91	27.05	15.71	38.62	25.58	20.58	36.06	20.26
ORTHOMCL9537	ISPD	20.23	32.6	21.94	28.24	6.04	27.8	36.58	29.83	29.85	26.05
ORTHOMCL5376	TKT2	65.52	37.78	33.91	27.05	15.71	38.62	25.58	20.58	36.06	20.26
ORTHOMCL10731	EMB3003	21.74	25.51	19.36	17.86	15.41	30.03	23.75	22.6	27.35	26.89
ORTHOMCL10819	F11A3.3	38.94	46.03	47.67	35.99	47.41	52.38	40.91	44.43	43.26	46.73
ORTHOMCL5584	KCS11	21.98	6.25	9.54	23.62	15.54	23.03	13.69	9.5	18.64	11.45
ORTHOMCL5584	KCS11	21.98	6.25	9.54	23.62	15.54	23.03	13.69	9.5	18.64	11.45
ORTHOMCL4855	VTE3	168.57	309.87	206.44	221.39	59.62	204.11	225.59	229.6	155.84	165.71
ORTHOMCL4855	VTE3	168.57	309.87	206.44	221.39	59.62	204.11	225.59	229.6	155.84	165.71
ORTHOMCL5482	ZDS	29.54	55.56	67.84	44.19	47.22	73.94	62.44	63.76	45.53	43.33
ORTHOMCL5482	ZDS	29.54	55.56	67.84	44.19	47.22	73.94	62.44	63.76	45.53	43.33
ORTHOMCL7080	HY2	8.23	10.01	9.94	7.38	5.49	11.98	11.72	8.04	13.59	14.91
ORTHOMCL10333	CHLD	25.32	30.78	22.37	21.94	10.29	38.01	30.28	39.61	27.17	29.67
ORTHOMCL9439	PGLP1B	92.69	200.75	130.79	142.14	20.84	101.75	109.72	120.39	95.9	60.61
ORTHOMCL9836	EPSPS-1	220.78	50.15	51.01	69.22	64.55	45.59	34.49	42.48	70.29	35.89
ORTHOMCL9975	BCAT2	31.39	43.8	35.78	39.1	56.69	48.41	45.96	66.14	48.13	48.72
ORTHOMCL9975	BCAT2	31.39	43.8	35.78	39.1	56.69	48.41	45.96	66.14	48.13	48.72
ORTHOMCL9975	BCAT2	31.39	43.8	35.78	39.1	56.69	48.41	45.96	66.14	48.13	48.72
